# Supplementary material for: Total synthesis of (±)-chamobtusin A
Source: Royal Society of Chemistry journal article supplement (doi:10.1039/c1cc12267c), 2011-01-01
Supplement: c1cc12267c.pdf [file c1cc12267c.pdf]

*Supporting information*

## Total Synthesis of (±)-Chamobtusin A

Hikaru Suzuki and Sakae Aoyagi\*

*School of Pharmacy, Tokyo University of Pharmacy & Life Sciences*

*Horinouchi, Hachioji, Tokyo 192-0392, Japan*

*aoyagis@toyaku.ac.jp*

**General Methods.** Reported melting points are uncorrected. Unless otherwise stated  $^1\text{H}$  and  $^{13}\text{C}$  NMR spectra were recorded in  $\text{CDCl}_3$  or  $\text{CD}_3\text{OD}$ , on a 400 MHz instrument. Proton chemical shifts are given in  $\delta$  (ppm) relative to internal  $\text{CHCl}_3$  (7.26 ppm) or  $\text{CD}_3\text{OH}$  (4.78 ppm). Carbon chemical shifts are given relative to  $\text{CDCl}_3$  (77.05 ppm) or  $\text{CD}_3\text{OD}$  (49.3 ppm). Analytical TLC was carried out with precoated silica gel 60F<sub>254</sub> plates (Merck). Flash column chromatography was performed on Silica gel 60N (spherical, neutral, 40-50 mm, Kanto Chemical Co., Inc.).

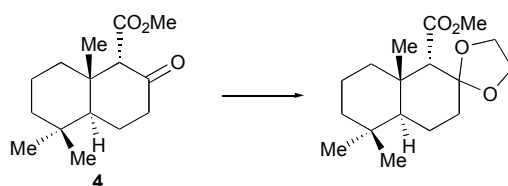

**Methyl (1'S\*,4a'S\*,8a'S\*)-5',5',8a'-Trimethyloctahydro-1'H-spiro[[1,3]dioxolane-2,2'-naphthalene]-1'-carboxylate.** Ethylene glycol (1.1 mL, 19.6 mmol) and trimethylsilyl chloride (2.1 mL, 15.7 mmol) were added to a solution of **4** (990 mg, 3.92 mmol) in dry  $\text{CH}_2\text{Cl}_2$  (8.0 mL) at room temperature. The mixture was heated at reflux for 23 h. After cooling, the reaction was quenched with saturated aqueous  $\text{NaHCO}_3$  (8.0 mL) at 0 °C, and the resulting mixture was extracted with  $\text{Et}_2\text{O}$  (3 x 8.0 mL). The combined extracts were washed with brine, then dried over  $\text{MgSO}_4$ , filtered, and concentrated under reduced pressure. The residue was purified by silica gel flash column chromatography (hexane/ $\text{EtOAc}$  10:1) to give the title compound (1.14 g, 98%) as white crystals. mp 78-79 °C (from hexane); IR (KBr)  $1735\text{ cm}^{-1}$ ;  $^1\text{H}$  NMR (400MHz,  $\text{CDCl}_3$ )  $\delta$  0.66 (3H, s), 0.82 (3H, s), 0.99-1.02 (1H, m), 1.14 (3H, s), 1.02-1.09 (1H, m), 1.34-1.41 (3H, m), 1.47 (1H, td,  $J = 13.6, 4.0\text{ Hz}$ ), 1.57-1.73 (3H, m), 2.13 (1H, dd,  $J = 12.5, 2.38\text{ Hz}$ ), 2.25 (1H, td,  $J = 13.8, 5.78\text{ Hz}$ ), 2.44 (1H, d,  $J = 1.78$

Hz), 3.66 (3H, s), 3.86-3.99 (4H, m);  $^{13}\text{C}$  NMR (100.6 MHz,  $\text{CDCl}_3$ )  $\delta$  18.5 ( $\text{CH}_2$ ), 19.7 ( $\text{CH}_2$ ), 21.4 ( $\text{CH}_3$ ), 21.9 ( $\text{CH}_3$ ), 33.1 (C), 33.4 ( $\text{CH}_2$ ), 33.5 ( $\text{CH}_3$ ), 38.2 (C), 38.5 ( $\text{CH}_2$ ), 41.8 ( $\text{CH}_2$ ), 45.3 (CH), 51.1 (CH), 62.6 ( $\text{CH}_3$ ), 63.9 ( $\text{CH}_2$ ), 64.5 ( $\text{CH}_2$ ), 109.1 (C) 172.6 (C); HRMS (ESI) calcd for  $\text{C}_{17}\text{H}_{29}\text{O}_4$   $[\text{M}+\text{H}]^+$  297.2066, found 297.2063. Anal. Calcd for  $\text{C}_{17}\text{H}_{28}\text{O}_4$ : C, 68.89; H, 9.52. Found: C, 68.92; H, 9.54.

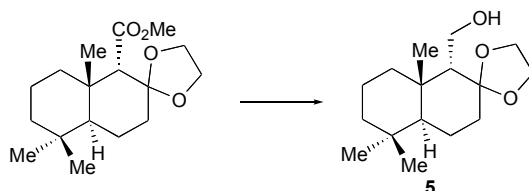

**2-((1'*R*\*,4*a*'*S*\*,8*a*'*S*\*)-5',5',8*a*'-Trimethyloctahydro-1'*H*-spiro[[1,3]dioxolane-2,2'-**

**naphthalene]-1'-yl)methanol (5).** A solution of the above ester (9.20 g, 31.0 mmol) in dry  $\text{Et}_2\text{O}$  (30 mL) was added to a stirred suspension of lithium aluminium hydride (3.53 g, 93.0 mmol) in dry  $\text{Et}_2\text{O}$  (280 mL) at 0 °C under argon, and stirring was continued for 19 h at room temperature. The reaction was quenched with successive addition of water (3.5 mL), 4M aqueous sodium hydroxide (3.5 mL), and water (7.0 mL). The suspension was filtrated through a Celite pad and the filtrate was concentrated under reduced pressure. The residue was purified by silica gel flash column chromatography (hexane/ $\text{AcOEt}$  2:1) to give **5** (8.20 g, 99%) as white crystals. mp 77-79 °C (from hexane); IR (KBr)  $3330\text{ cm}^{-1}$ ;  $^1\text{H}$  NMR (400MHz,  $\text{CDCl}_3$ )  $\delta$  0.81 (3H, s), 0.85 (3H, s), 0.94 (1H, dd,  $J = 12.3, 3.11$  Hz), 1.08-1.16 (1H, m), 1.16 (3H, s), 1.22-1.27 (1H, m), 1.37-1.77 (9H, m), 3.29 (1H, dd,  $J = 10.0, 2.41$  Hz), 3.76-4.01 (6H, m);  $^{13}\text{C}$  NMR (100.6 MHz,  $\text{CDCl}_3$ )  $\delta$  18.7 ( $\text{CH}_2$ ), 20.4 ( $\text{CH}_2$ ), 22.1 ( $\text{CH}_3$ ), 22.6 ( $\text{CH}_3$ ), 33.1 ( $\text{CH}_2$ ), 33.4 (C), 33.5 ( $\text{CH}_3$ ), 37.3 ( $\text{CH}_2$ ), 38.5 (C), 42.4 ( $\text{CH}_2$ ), 48.2 (CH), 57.2 (CH), 61.2 ( $\text{CH}_2$ ), 63.5 ( $\text{CH}_2$ ), 64.2 ( $\text{CH}_2$ ), 113.1 (C); HRMS (ESI) calcd for  $\text{C}_{16}\text{H}_{29}\text{O}_3$   $[\text{M}+\text{H}]^+$  269.2117, found 269.2113. Anal. Calcd for  $\text{C}_{16}\text{H}_{28}\text{O}_3$ : C, 71.60; H, 10.52. Found: C, 71.50; H, 10.49.

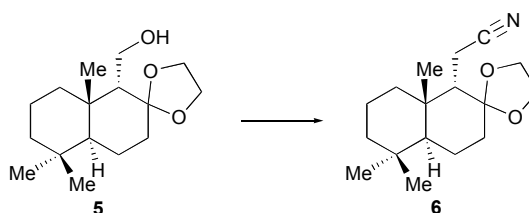

**2-((1'*S*\*,4*a*'*S*\*,8*a*'*S*\*)-5',5',8*a*'-Trimethyloctahydro-1'*H*-spiro[[1,3]dioxolane-2,2'-**

**naphthalene]-1'-yl)acetonitrile (6).** *p*-Toluenesulfonyl chloride (12.3 g, 61.2 mmol) was added to a solution of **5** (8.20 g, 30.6 mmol) in pyridine (31.0 mL) at 0 °C under argon. After stirring for 2 h at 0 °C, the reaction was quenched with a saturated aqueous solution of copper (II) sulfate penta hydrate (30 mL), and the resulting mixture was extracted with Et<sub>2</sub>O (3 x 50 mL). The combined extracts were washed with brine, then dried over MgSO<sub>4</sub> and concentrated under reduced pressure to afford a yellow oil, which was used in the next step without further purification. KCN (4.98 g, 76.5 mmol) and 18-crown-6 (5.65 g, 30.6 mmol) were added to a solution of the above residue in MeCN (61.0 mL) at room temperature. The mixture was heated at reflux for 4 h. After cooling, the reaction was diluted with a saturated aqueous solution of NaHCO<sub>3</sub> (30 mL) at 0 °C, and the resulting mixture was extracted with Et<sub>2</sub>O (3 x 60 mL). The combined extracts were washed with brine, then dried over MgSO<sub>4</sub>, filtered, and concentrated under reduced pressure. The residue was purified by silica gel flash column chromatography (hexane/EtOAc 4:1) to give **6** (6.44 g, 76% from **5**) as a yellow oil. IR (neat) 2242 cm<sup>-1</sup>; <sup>1</sup>H NMR (400MHz, CDCl<sub>3</sub>) δ 0.83 (3H, s), 0.89 (3H, s), 0.89-1.18 (1H, m), 1.20 (3H, s), 1.38-1.56 (8H, m), 1.68-1.71 (3H, m), 1.37-1.58 (8H, m), 1.68-1.71 (3H, m), 2.64 (1H, dd, *J* = 17.3, 7.3 Hz), 2.65 (1H, dd, *J* = 17.3, 3.69 Hz), 3.87-4.03 (4H, m); <sup>13</sup>C NMR (100.6 MHz, CDCl<sub>3</sub>) δ 15.1 (CH<sub>2</sub>), 18.5 (CH<sub>2</sub>), 19.8 (CH<sub>2</sub>), 21.8 (CH<sub>3</sub>), 22.3 (CH<sub>3</sub>), 33.1 (C), 33.2 (CH<sub>2</sub>), 33.5 (CH<sub>3</sub>), 37.8 (CH<sub>2</sub>), 38.6 (C), 42.2 (CH<sub>2</sub>), 46.3 (CH), 52.9 (CH), 63.6 (CH<sub>2</sub>), 64.9 (CH<sub>2</sub>), 109.9 (C), 121.5 (C); HRMS (ESI) calcd for C<sub>17</sub>H<sub>28</sub>NO<sub>2</sub> [M+H]<sup>+</sup> 278.2120, found 278.2125. Anal. Calcd for C<sub>17</sub>H<sub>27</sub>NO<sub>2</sub>: C, 73.61; H, 9.81; N, 5.05. Found: C, 73.46; H, 9.72; N, 5.16.

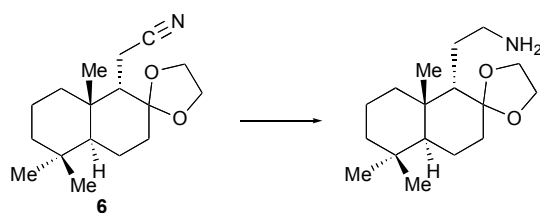

**2-((1'S\*,4a'S\*,8a'S\*)-5',5',8a'-Trimethyloctahydro-1'H-spiro[[1,3]dioxolane-2,2'-naphthalene]-1'-yl)ethanamine.** A solution of **6** (6.44 g, 23.2 mmol) in dry Et<sub>2</sub>O (10 mL) was added to a stirred suspension of lithium aluminium hydride (2.64 g, 69.6 mmol) in dry Et<sub>2</sub>O (220 mL) at 0 °C under argon, and stirring was continued for 2 h at 0 °C. The reaction was quenched with successive addition of water (2.5 mL), 4M aqueous sodium hydroxide (2.5 mL), and water (5.0 mL). The suspension was filtrated through a Celite pad and the

filtrate was concentrated under reduced pressure. The residue was purified by silica gel flash column chromatography ( $\text{CHCl}_3/\text{MeOH}/\text{NH}_4\text{OH}$  100:9:1) to give the title compound (6.26 g, 96%) as a colorless oil. IR (neat)  $3372\text{ cm}^{-1}$ ;  $^1\text{H}$  NMR (400MHz,  $\text{CDCl}_3$ )  $\delta$  0.80 (3H, s), 1.02-1.06 (3H, m), 1.13 (3H, s), 1.35-1.38 (4H, m), 1.38-1.62 (9H, m), 2.59-2.64 (2H, m), 3.78-4.11 (4H, m);  $^{13}\text{C}$  NMR (100.6 MHz,  $\text{CDCl}_3$ )  $\delta$  18.5 ( $\text{CH}_2$ ), 20.2 ( $\text{CH}_2$ ), 21.6 ( $\text{CH}_3$ ), 22.8 ( $\text{CH}_3$ ), 32.7 (C), 32.9 ( $\text{CH}_2$ ), 33.3 ( $\text{CH}_2$ ), 33.4 ( $\text{CH}_3$ ), 36.4 ( $\text{CH}_2$ ), 38.8 (C), 42.3 ( $\text{CH}_2$ ), 44.7 ( $\text{CH}_2$ ), 46.3 (CH), 52.9 (CH), 63.3 ( $\text{CH}_2$ ), 64.5 ( $\text{CH}_2$ ). 112.3 (C); HRMS (ESI) calcd for  $\text{C}_{17}\text{H}_{32}\text{NO}_2$   $[\text{M}+\text{H}]^+$  282.2433, found 282.2435. Anal. Calcd for  $\text{C}_{17}\text{H}_{31}\text{NO}_2$ : C, 72.55; H, 11.10; N, 4.98. Found: C, 72.33; H, 10.84; N, 5.02.

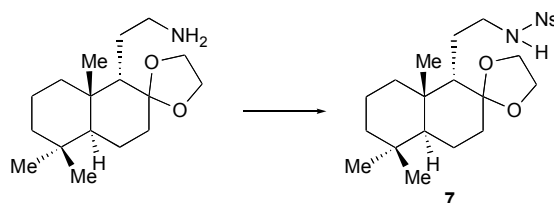

**2-Nitro-N-(2-((1'*S*\*,4*a*'*S*\*,8*a*'*S*\*)-5',5',8*a*'-trimethyloctahydro-1'*H*-spiro[[1,3]-dioxolane-2,2'-naphthalene]-1'-yl)ethyl)benzenesulfonamide (7).** Triethylamine (1.66 mL, 11.9 mmol) and *o*-NsCl (791mg, 3.57 mmol) were added to a stirred solution of the above amine in dry  $\text{CH}_2\text{Cl}_2$  (24 mL) at 0 °C under argon. After 5 min, the reaction was quenched with a saturated aqueous solution of  $\text{NaHCO}_3$  (30 mL) at 0 °C, and the resulting mixture was extracted with  $\text{Et}_2\text{O}$  (3 x 40 mL). The combined extracts were washed with brine, then dried over  $\text{MgSO}_4$ , filtered, and concentrated under reduced pressure. The residue was purified by silica gel flash column chromatography (hexane/ $\text{EtOAc}$  2:1) to give **7** (1.11 g, 100%) as an amorphous solid. IR (KBr)  $3334, 1541\text{ cm}^{-1}$ ;  $^1\text{H}$  NMR (400MHz,  $\text{CDCl}_3$ )  $\delta$  0.79 (3H, s), 0.83 (3H, s), 0.88-0.90 (1H, m), 0.98-1.09 (2H, m), 1.10 (3H, s), 1.14-1.15 (1H, m), 1.22-1.48 (7H, m), 1.59-1.67 (3H, m), 2.96-3.04 (1H, m), 3.10-3.16 (1H, m), 3.83-3.98 (4H, m), 5.74 (1H, t,  $J = 4.75\text{ Hz}$ ), 7.71-7.74 (2H, m), 7.84-7.86 (1H, m), 8.10-8.13 (1H, m);  $^{13}\text{C}$  NMR (100.6 MHz,  $\text{CDCl}_3$ )  $\delta$  18.4 ( $\text{CH}_2$ ), 20.0 ( $\text{CH}_2$ ), 21.5 ( $\text{CH}_3$ ), 22.6 ( $\text{CH}_3$ ), 27.0 ( $\text{CH}_2$ ), 32.90 (C), 32.91 ( $\text{CH}_3$ ), 33.4 ( $\text{CH}_2$ ), 36.0 ( $\text{CH}_2$ ), 38.9 (C), 42.3 ( $\text{CH}_2$ ), 45.5 ( $\text{CH}_2$ ), 46.4 (CH), 53.3 (CH), 63.2 ( $\text{CH}_2$ ), 64.8 ( $\text{CH}_2$ ), 111.8 (C), 125.3 (CH), 131.1 (CH), 132.6 (CH), 133.3 (CH), 133.9 (C), 148.1 (C); HRMS (ESI) calcd for  $\text{C}_{23}\text{H}_{35}\text{N}_2\text{O}_6\text{S}$   $[\text{M}+\text{H}]^+$  467.2216, found 467.2200.

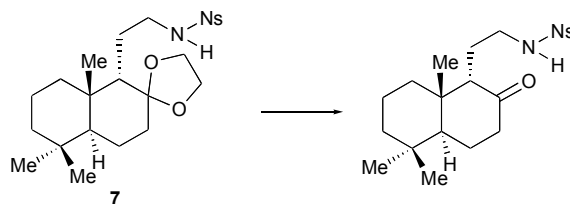

**2-Nitro-N-(2-((1'S\*,4a'S\*,8a'S\*)-5',5',8a'-trimethyl-2-oxodecaphthalene-**

**1-yl)ethyl)benzenesulfonamide** . An aqueous 5% HCl solution (0.98 mL, 1.35 mmol) was added to a stirred solution of **7** (126 mg, 0.27 mmol) in dry THF (2.7 mL) at 0 °C under argon. After stirring for 8 h at 0 °C, the reaction was quenched with saturated aqueous NaHCO<sub>3</sub> (3.0 mL) at 0 °C, and the resulting mixture was extracted with Et<sub>2</sub>O (3 x 10 mL). The combined extracts were washed with brine, then dried over MgSO<sub>4</sub>, filtered, and concentrated under reduced pressure. The residue was purified by silica gel flash column chromatography (hexane/EtOAc 3:1) to give the title compound (101 mg, 89%) as white crystals. mp 135-136 °C; IR (KBr) 3300, 1687, 1541 cm<sup>-1</sup>; <sup>1</sup>H NMR (400MHz, CDCl<sub>3</sub>) δ 0.85 (3H, s), 0.90 (3H, s), 0.95 (3H, s), 1.01-1.05 (1H, m), 1.14-1.22 (1H, m), 1.41-1.63 (6H, m), 1.70-1.80 (2H, m), 1.90-2.01 (2H, m), 2.31-2.37 (2H, m), 2.81-2.88 (1H, m), 3.00-3.08 (1H, m), 5.56 (1H, t, *J* = 6.21 Hz), 7.70-7.74 (2H, m), 7.84-7.86 (1H, m), 8.07-8.10 (1H, m); <sup>13</sup>C NMR (100.6 MHz, CDCl<sub>3</sub>) δ 18.5 (CH<sub>2</sub>), 22.0 (CH<sub>3</sub>), 22.1 (CH<sub>3</sub>), 23.1 (CH<sub>2</sub>), 27.8 (CH<sub>2</sub>), 33.3 (C), 33.4 (CH<sub>3</sub>), 36.3 (CH<sub>2</sub>), 38.4 (CH<sub>2</sub>), 39.7 (C), 42.0 (CH<sub>2</sub>), 42.2 (CH<sub>2</sub>), 44.8 (CH), 61.9 (CH), 125.4 (CH), 131.0 (CH), 132.8 (CH), 133.6 (CH), 133.7 (C), 140.1 (C), 215.2 (C); HRMS (ESI) calcd for C<sub>21</sub>H<sub>31</sub>N<sub>2</sub>O<sub>5</sub>S [M+H]<sup>+</sup> 423.1954, found 423.1977. Anal. Calcd for C<sub>21</sub>H<sub>30</sub>N<sub>2</sub>O<sub>5</sub>S: C, 59.69; H, 7.16; N, 6.63. Found: C, 59.67 H, 7.04; N, 6.67.

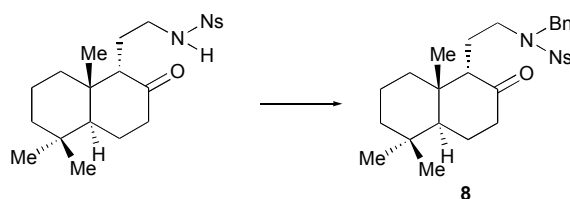

**N-Benzyl-2-nitro-N-(2-((1'S\*,4a'S\*,8a'S\*)-5',5',8a'-trimethyl-2-oxodecaphthalene-**

**1-yl)ethyl)benzenesulfonamide (8)**. Benzyl alcohol (72.0 μL, 0.69 mmol) and triphenyl phosphine (157 mg, 0.60 mmol) were added to a stirred solution of the above ketone (195 mg, 0.46 mmol) in dry toluene (4.6 mL) at room temperature under argon. And then, diethyl azodicarboxylate (40 % in toluene, 0.27 mL, 0.60 mmol) was added to the above

mixture at 0 °C. After stirring for 10 min at room temperature, the mixture was directly purified by silica gel flash column chromatography (hexane/EtOAc 2:1) to give **8** (236 mg, 100%) as white crystals. mp 137-138 °C; IR (KBr) 1702, 1543 cm<sup>-1</sup>; <sup>1</sup>H NMR (400MHz, CDCl<sub>3</sub>) δ 0.79 (3H, s), 0.80 (3H, s), 0.90 (3H, s), 1.05-1.30 (3H, m), 1.37-1.51 (7H, m), 1.70-1.85 (2H, m), 2.09-2.14 (2H, m), 2.93-3.06 (2H, m), 4.45 (1H, d, *J* = 14.9 Hz), 4.51 (1H, d, *J* = 14.9 Hz), 7.29-7.32 (5H, m), 7.63-7.70 (3H, m), 7.91-7.94 (1H, m); <sup>13</sup>C NMR (100.6 MHz, CDCl<sub>3</sub>) δ 18.5 (CH<sub>2</sub>), 21.7 (CH<sub>3</sub>), 22.0 (CH<sub>3</sub>), 23.1 (CH<sub>2</sub>), 26.7 (CH<sub>2</sub>), 33.2 (C), 33.3 (CH<sub>3</sub>), 36.1 (CH<sub>2</sub>), 38.0 (CH<sub>2</sub>), 39.8 (C), 42.1 (CH<sub>2</sub>), 44.6 (CH), 47.0 (CH<sub>2</sub>), 53.1 (CH<sub>2</sub>), 62.3 (CH), 124.3 (CH), 128.3 (CH), 128.7 (CH, 2 carbons), 128.8 (CH, 2 carbons), 130.1 (CH), 131.7 (CH), 133.1 (C), 133.5 (CH), 135.9 (C), 148.2 (C), 214.8 (C); HRMS (ESI) calcd for C<sub>28</sub>H<sub>37</sub>N<sub>2</sub>O<sub>5</sub>S [M+H]<sup>+</sup> 513.2423, found 513.2437. Anal. Calcd for C<sub>28</sub>H<sub>36</sub>N<sub>2</sub>O<sub>5</sub>S: C, 65.60; H, 7.08; N, 5.46. Found: C, 65.63 H, 7.00; N, 5.49.

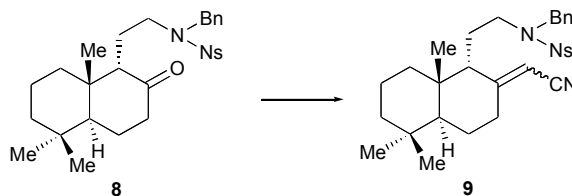

***N*-Benzyl-*N*-(2-((1*R*\*,4*aS*\*,8*aS*\*)-2-(cyanomethylene)-5',5',8*a*'-trimethyl-2-oxodecahydronaphthalene-1-yl)ethyl)-2-nitrobenzenesulfonamide (**9**).** *n*-BuLi (1.6 M solution in hexane, 12.0 mL, 19.2 mmol) was added dropwise to a stirred solution of diethyl cyanomethylphosphonate (3.89 mL, 23.0 mmol) in dry THF (60 mL) at 0 °C under argon, and stirring was continued for 1 h at room temperature. A solution of **8** (3.93 g, 7.67 mmol) in dry THF (20 mL) was added dropwise to the above mixture at 0 °C. After stirring for 24 h at room temperature, the reaction was quenched with water (30 mL) at 0 °C, and the resulting mixture was extracted with Et<sub>2</sub>O (3 x 100 mL). The combined extracts were washed with brine, then dried over MgSO<sub>4</sub>, filtered, and concentrated under reduced pressure. The residue was purified by silica gel flash column chromatography (hexane/EtOAc 4:1) to give **9** (as an E/Z mixture in the ratio of 1:1) (3.78 g, 92%) as a yellow oil. IR (neat) 2214, 1545 cm<sup>-1</sup>; <sup>1</sup>H NMR (400MHz, CDCl<sub>3</sub>) δ 0.74-0.85 (9H, m), 0.85-0.95 (1H, m), 1.05-1.58 (10H, m), 1.65-1.67 (3H, m), 2.00-2.11 (1H, m), 2.14-2.20 (0.5H, m), 2.65-2.75 (0.5H, m), 2.80-3.14 (2H, m), 4.40 (1H, t, *J* = 14.1 Hz), 4.55 (1H, d, *J* = 14.6 Hz), 4.86 (0.5H, d, *J* = 1.46 Hz), 5.07 (0.5H, d, *J* = 1.84 Hz), 7.27-7.34 (5H, m), 7.64-7.71 (3H, m), 7.92-8.00 (1H, m); <sup>13</sup>C NMR

(100.6 MHz, CDCl<sub>3</sub>) δ 18.7 (CH<sub>2</sub>, 2 carbons), 21.2 (CH<sub>3</sub>), 21.9 (CH<sub>3</sub>, 3 carbons), 23.2 (CH<sub>2</sub>), 23.6 (CH<sub>2</sub>), 26.2 (CH<sub>2</sub>), 27.4 (CH<sub>2</sub>), 29.3 (CH<sub>2</sub>), 32.2 (CH<sub>2</sub>), 33.17 (C, 2 carbons), 33.23 (CH<sub>3</sub>), 33.27 (CH<sub>3</sub>), 36.08 (CH<sub>2</sub>), 36.12 (CH<sub>2</sub>), 39.20 (C), 39.29 (C), 42.1 (CH<sub>2</sub>, 2 carbons), 45.2 (CH), 45.3 (CH), 47.0 (CH<sub>2</sub>), 47.4 (CH<sub>2</sub>), 52.5 (CH<sub>2</sub>), 53.1 (CH), 53.3 (CH<sub>2</sub>), 56.2 (CH), 94.1 (CH), 94.2 (CH), 116.5 (C), 117.0 (C), 124.2 (CH), 124.3 (CH), 128.2 (CH), 128.3 (CH), 128.66 (CH, 2 carbons), 128.79 (CH, 2 carbons), 128.83 (CH, 2 carbons), 128.86 (CH, 2 carbons), 130.7 (CH), 130.9 (CH), 131.7 (CH), 131.8 (CH), 133.0 (C), 133.1 (C), 133.5 (CH), 133.7 (CH), 135.6 (C), 136.0 (C), 148.1 (C), 148.2 (C), 168.9 (C), 169.5 (C); HRMS (ESI) calcd for C<sub>30</sub>H<sub>38</sub>N<sub>3</sub>O<sub>4</sub>S [M+H]<sup>+</sup> 536.2583, found 536.2562.

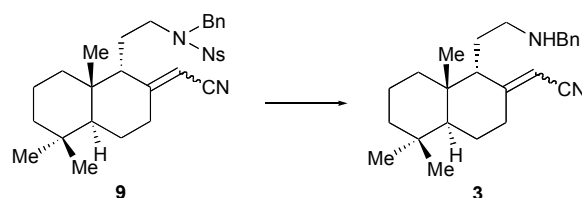

**2-((1*R*\*,4*aS*\*,8*aS*\*)-1-(2-(Benzylamino)ethyl)-5,5,8,1-trimethyloctahydronaphthalene-**

**2(1*H*)-ylidene)acetonitrile (3).** Thiophenol (0.31 mL, 2.96 mmol) and 5 M aqueous KOH (0.30 mL, 1.48 mmol) were added dropwise to a stirred solution of **9** (396 mg, 0.739 mmol) in MeCN (4.0 mL) at 0 °C under argon. After stirring for 4 h at room temperature, the mixture was directly purified by silica gel flash column chromatography (CHCl<sub>3</sub>/MeOH 20:1) to give **3** (236 mg, 91%) as a yellow oil. IR (neat) 3313, 2214 cm<sup>-1</sup>; <sup>1</sup>H NMR (major diastereomer, 400MHz, CDCl<sub>3</sub>) δ 0.81 (3H, s), 0.88 (3H, s), 0.95 (3H, s), 1.15-1.19 (2H, m), 1.38-1.75 (9H, m), 1.90-2.00 (1H, m), 2.26-2.30 (2H, m), 3.68 (1H, d, *J* = 13.0 Hz), 3.75 (1H, d, *J* = 12.9 Hz), 5.12 (1H, s), 7.22-7.37 (5H, m); <sup>13</sup>C NMR (100.6 MHz, CDCl<sub>3</sub>) δ 18.8 (CH<sub>2</sub>), 21.5 (CH<sub>3</sub>), 22.0 (CH<sub>3</sub>), 23.9 (CH<sub>2</sub>), 28.1 (CH<sub>2</sub>), 32.5 (CH<sub>2</sub>), 33.3 (C), 33.4 (CH<sub>3</sub>), 36.4 (CH<sub>2</sub>), 39.5 (C), 42.3 (CH<sub>2</sub>), 45.4 (CH), 47.9 (CH<sub>2</sub>), 53.5 (CH), 54.3 (CH<sub>2</sub>), 94.0 (CH), 117.3 (C), 126.9 (CH), 128.2 (CH, 2 carbons), 128.4 (CH, 2 carbons), 140.3 (C), 170.1 (C); HRMS (ESI) calcd for C<sub>24</sub>H<sub>35</sub>N<sub>2</sub> [M+H]<sup>+</sup> 351.2800, found 351.2794.

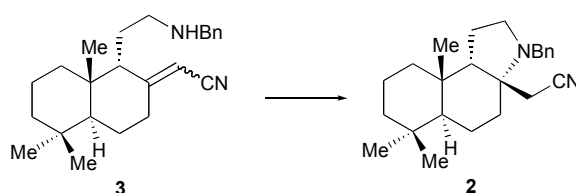

**2-((3a*S*\*,5a*S*\*,9a*S*\*)-3-Benzyl-6,6,9a-trimethylperhydro-1*H*-benzo[*e*]indol-3a-yl)acetonitrile (2).**

*N,N*-Diisopropylethylamine (0.36 mL, 2.18 mmol) was added to a stirred solution of **3** (153 mg, 0.436 mmol) in EtOH (4.4 mL) at room temperature under argon. The mixture was heated at reflux for 24 h. After cooling, the reaction was quenched with saturated aqueous NH<sub>4</sub>Cl (5.0 mL) at 0 °C, and the resulting mixture was extracted with Et<sub>2</sub>O (3 x 10 mL). The combined extracts were washed with brine, then dried over MgSO<sub>4</sub>, filtered, and concentrated under reduced pressure. The residue was purified by silica gel flash column chromatography (hexane/EtOAc 5:1) to give **2** (123 mg, 80%) as white crystals. mp 154-156 °C; IR (KBr) 2243 cm<sup>-1</sup>; <sup>1</sup>H NMR (400MHz, CDCl<sub>3</sub>) δ 0.83 (3H,s), 0.90 (3H, s), 1.10-1.20 (3H, m), 1.23 (3H, s), 1.23-1.29 (2H, m), 1.50-1.70 (3H, m), 1.78-1.81 (2H, m), 2.14 (1H, t, *J* = 10.2 Hz), 2.25-2.31 (1H, m), 2.65 (1H, d, *J* = 17.4 Hz), 2.92-2.97 (1H, m), 2.99 (1H, d, *J* = 17.4 Hz), 3.14 (1H, d, *J* = 13.2 Hz), 3.91 (1H, d, *J* = 13.2 Hz), 7.12-7.73 (5H, m); <sup>13</sup>C NMR (100.6 MHz, CDCl<sub>3</sub>) δ 18.2 (CH<sub>2</sub>), 19.5 (CH<sub>2</sub>), 21.6 (CH<sub>3</sub>), 22.7 (CH<sub>3</sub>), 23.7 (CH<sub>2</sub>), 26.6 (CH<sub>2</sub>), 28.3 (CH<sub>2</sub>), 32.9 (C), 33.4 (CH<sub>3</sub>), 36.3 (C), 37.3 (CH<sub>2</sub>), 42.2 (CH<sub>2</sub>), 46.5 (CH), 48.9 (CH<sub>2</sub>), 52.0 (CH<sub>2</sub>), 55.6 (CH), 62.3 (C), 118.6 (C), 126.9 (CH), 128.3 (CH, 2 carbons), 128.4 (CH, 2 carbons), 139.6 (C); HRMS (ESI) calcd for C<sub>24</sub>H<sub>35</sub>N<sub>2</sub> [M+H]<sup>+</sup> 351.2800, found 351.2812. Anal. Calcd for C<sub>24</sub>H<sub>34</sub>N<sub>2</sub>: C, 82.23; H, 9.78; N, 7.99. Found: C, 82.08 H, 9.86; N, 7.98.

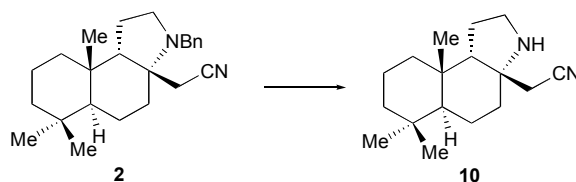

**2-((3a*S*\*,5a*S*\*,9a*S*\*)-6,6,9a-Trimethylperhydro-1*H*-benzo[*e*]indol-3a-yl)acetonitrile (10).**

Celium(IV) ammonium nitrate (64.0 mg, 0.116 mmol) was added to a stirred solution of **2** (13.5 mg, 38.5 μmol) in (MeCN/CH<sub>2</sub>Cl<sub>2</sub>/H<sub>2</sub>O 4:1:1, 0.5 mL) at 0 °C under argon. After stirring for 3.5 h at room temperature, the reaction was quenched with saturated aqueous



NaHCO<sub>3</sub> (1.0 mL) at 0 °C, and the resulting mixture was extracted with CHCl<sub>3</sub> (3 x 10 mL). The combined extracts were washed with brine, then dried over MgSO<sub>4</sub>, filtered, and concentrated under reduced pressure. The residue was purified by silica gel flash column chromatography (CHCl<sub>3</sub>/MeOH 20:1) to give **10** (8.5 mg, 85%) as white crystals. mp 87-89 °C; IR (KBr) 3435, 2240 cm<sup>-1</sup>; <sup>1</sup>H NMR (400MHz, CDCl<sub>3</sub>) δ 0.81 (3H, s), 0.88 (3H, s), 1.11 (3H, s), 1.18-1.30 (5H, m), 1.38-1.42 (2H, m), 1.74 (1H, t, *J* = 10.1 Hz), 1.89-1.92 (2H, m), 1.98 (1H, br s), 2.69 (1H, d, *J* = 16.7 Hz), 2.70 (1H, d, *J* = 16.7 Hz), 2.97-3.02 (2H, m); <sup>13</sup>C NMR (100.6 MHz, CDCl<sub>3</sub>) δ 18.3 (CH<sub>2</sub>), 19.9 (CH<sub>2</sub>), 21.7 (CH<sub>3</sub>), 22.7 (CH<sub>3</sub>), 27.8 (CH<sub>2</sub>), 29.5 (CH<sub>2</sub>), 32.9 (C), 33.4 (CH<sub>3</sub>), 34.9 (CH<sub>2</sub>), 36.0 (C), 38.2 (CH<sub>2</sub>), 42.2 (CH, 2 carbons), 46.5 (CH), 57.0 (CH), 60.4 (C), 118.5 (C); HRMS (ESI) calcd for C<sub>17</sub>H<sub>29</sub>N<sub>2</sub> [M+H]<sup>+</sup> 261.2331, found 261.2333. Anal. Calcd for C<sub>17</sub>H<sub>28</sub>N<sub>2</sub>: C, 78.41; H, 10.84; N, 10.76. Found: C, 78.23 H, 10.63; N, 10.63.

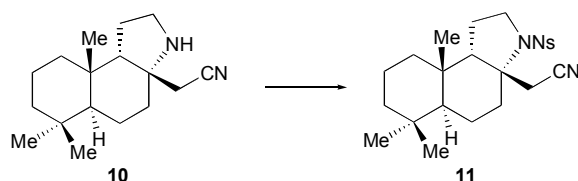

**2-((3a*S*\*,5a*S*\*,9a*S*\*)-6,6,9a-Trimethyl-3-(2-nitrobenzenesulfonyl)perhydro-1*H*-**

**benzo[*e*]indol-3a-yl)acetonitrile (11).** Triethylamine (0.28 mL, 2.00 mmol) and *o*-NsCl (221 mg, 0.988 mmol) were added to a stirred solution of **10** (104 mg, 0.399 mmol) in CH<sub>2</sub>Cl<sub>2</sub> (4.0 mL) at 0 °C under argon. After stirring for 8 h at room temperature, the reaction was quenched with saturated aqueous NaHCO<sub>3</sub> (4.0 mL) at 0 °C, and the resulting mixture was extracted with Et<sub>2</sub>O (3 x 15 mL). The combined extracts were washed with brine, then dried over MgSO<sub>4</sub>, filtered, and concentrated under reduced pressure. The residue was purified by silica gel flash column chromatography (hexane/EtOAc 2:1) to give **11** (147 mg, 83%) as white crystals. mp 221-224 °C; IR (KBr) 2246, 1545 cm<sup>-1</sup>; <sup>1</sup>H NMR (400MHz, CDCl<sub>3</sub>) δ 0.80 (3H, s), 0.88 (3H, s), 1.11-1.23 (3H, m), 1.21 (3H, s), 1.30-1.33 (2H, m), 1.41-1.47 (2H, m), 1.56-1.63 (2H, m), 1.94-1.98 (2H, m), 2.01-2.15 (1H, m), 2.26 (1H, dd, *J* = 12.98, 6.35 Hz), 2.37 (1H, d, *J* = 13.9 Hz), 3.05 (1H, d, *J* = 17.8 Hz), 3.13 (1H, td, *J* = 10.7, 6.89 Hz), 3.74 (1H, d, *J* = 17.9 Hz), 3.79 (1H, t, *J* = 9.27 Hz), 7.56-7.59 (1H, m), 7.67-7.72 (2H, m), 8.11-8.13 (1H, m); <sup>13</sup>C NMR (100.6 MHz, CDCl<sub>3</sub>) δ 18.2 (CH<sub>2</sub>), 20.0 (CH<sub>2</sub>), 21.6 (CH<sub>3</sub>), 22.4 (CH<sub>3</sub>), 25.2 (CH<sub>2</sub>), 27.4 (CH<sub>2</sub>), 32.9 (C), 33.3 (CH<sub>3</sub>), 36.4 (CH<sub>2</sub>), 38.1 (CH<sub>2</sub>), 41.9 (CH<sub>2</sub>), 46.8

(CH), 47.6 (CH<sub>2</sub>), 57.2 (CH), 69.1 (C), 118.3 (C), 124.0 (CH), 130.3 (CH), 131.8 (CH), 133.0 (C), 133.8 (CH), 148.6 (C); HRMS (ESI) calcd for C<sub>23</sub>H<sub>33</sub>N<sub>3</sub>O<sub>4</sub>S [M+H]<sup>+</sup> 446.2114, found 446.2118. Anal. Calcd for C<sub>23</sub>H<sub>32</sub>N<sub>3</sub>O<sub>4</sub>S: C, 62.00; H, 7.01; N, 9.42. Found: C, 61.93; H, 7.04; N, 9.45.

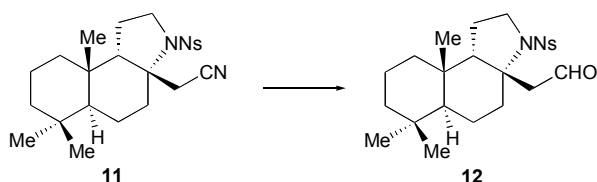

**2-((3aS\*,5aS\*,9aS\*)-6,6,9a-Trimethyl-3-(2-nitrobenzenesulfonyl)perhydro-1H-**

**benzo[e]indol-3a-yl)acetaldehyde (12).** DIBAL-H (1.01 M in toluene, 0.65 mL, 0.66 mmol) was added dropwise to a stirred solution of **11** (147 mg, 0.33 mmol) in CH<sub>2</sub>Cl<sub>2</sub> (3.3 mL) at -78 °C under argon. After stirring for 30 min at -78 °C, 1M HCl (1.0 mL) was added to the mixture. After warming to room temperature very slowly, the reaction was quenched with saturated aqueous NaHCO<sub>3</sub> (4.0 mL) at 0 °C, and the resulting mixture was extracted with Et<sub>2</sub>O (3 x 15 mL). The combined extracts were washed with brine, then dried over MgSO<sub>4</sub>, filtered, and concentrated under reduced pressure. The residue was purified by silica gel flash column chromatography (hexane/EtOAc 2:1) to give **12** (125 mg, 85%) as white crystals. mp 201-203 °C; IR (KBr) 1720, 1543 cm<sup>-1</sup>; <sup>1</sup>H NMR (400MHz, CDCl<sub>3</sub>) δ 0.77 (3H, s), 0.86 (3H, s), 1.08 (3H, s), 1.13-1.28 (5H, m), 1.38-1.45 (2H, m), 1.52-1.68 (2H, m), 1.66 (1H, td, *J* = 13.1, 4.22 Hz), 1.90 (1H, dd, *J* = 12.1, 6.06), 1.94-2.07 (1H, m), 2.16 (1H, dd, *J* = 13.1, 6.14), 2.21-2.25 (1H, br d, *J* = 13.7 Hz), 3.06 (1H, dd, *J* = 18.2, 3.13 Hz), 3.27 (1H, td, *J* = 10.11, 6.6 Hz), 3.54 (1H, d, *J* = 18.2 Hz), 3.78 (1H, d, *J* = 9.08 Hz), 9.74 (1H, d, *J* = 2.96 Hz); <sup>13</sup>C NMR (100.6 MHz, CDCl<sub>3</sub>) δ 18.3 (CH<sub>2</sub>), 20.0 (CH<sub>2</sub>), 21.7 (CH<sub>3</sub>), 23.1 (CH<sub>3</sub>), 25.3 (CH<sub>2</sub>), 32.9 (C), 33.3 (CH<sub>3</sub>), 36.9 (C), 37.7 (CH<sub>2</sub>), 38.2 (CH<sub>2</sub>), 42.0 (CH<sub>2</sub>), 46.9 (CH), 48.3 (CH<sub>2</sub>), 48.8 (CH<sub>2</sub>), 56.5 (CH), 68.8 (C), 123.9 (CH), 130.1 (CH), 131.5 (CH), 133.6 (CH), 134.1 (CH), 148.3 (C), 201.8 (CH); HRMS (ESI) calcd for C<sub>23</sub>H<sub>33</sub>N<sub>2</sub>O<sub>5</sub>S [M+H]<sup>+</sup> 449.2110, found 449.2102. Anal. Calcd for C<sub>23</sub>H<sub>32</sub>N<sub>2</sub>O<sub>5</sub>S: C, 61.58; H, 7.19; N, 6.24. Found: C, 61.43; H, 7.23; N, 6.32.

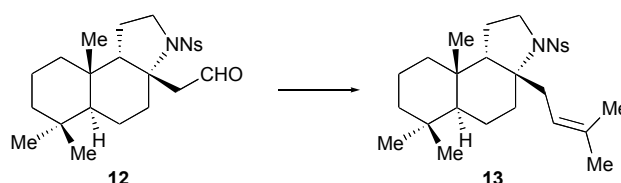

**(3aS\*,5aS\*,9aS\*)-6,6,9a-Trimethyl-3a-(3-methylbut-2-enyl)-3-(2-nitrobenzenesulfonyl)-perhydro-1H-benzo[e]indole (13).** *n*-BuLi (1.6 M solution in hexane, 33.0  $\mu$ L, 53.0  $\mu$ mol) was added dropwise to a stirred suspension of isopropyltriphenylphosphonium iodide (24.0 mg, 54.4  $\mu$ mol) in dry THF (300  $\mu$ L) at 0  $^{\circ}$ C under argon, and stirring was continued for 30 min at the same temperature. A solution of **12** (6.10 mg, 13.6  $\mu$ mol) in dry THF (300  $\mu$ L) was added dropwise to the above mixture at 0  $^{\circ}$ C. After stirring for 15 h at room temperature, the reaction was quenched with saturated aqueous  $\text{NH}_4\text{Cl}$  (1.0 mL) at 0  $^{\circ}$ C, and the resulting mixture was extracted with  $\text{Et}_2\text{O}$  (3 x 10 mL). The combined extracts were washed with brine, then dried over  $\text{MgSO}_4$ , filtered, and concentrated under reduced pressure. The residue was purified by silica gel flash column chromatography (hexane/ $\text{EtOAc}$  4:1) to give **13** (4.50 mg, 70%) as yellow crystals. mp 141-143  $^{\circ}$ C; IR (KBr) 1543  $\text{cm}^{-1}$ ;  $^1\text{H}$  NMR (400MHz,  $\text{CDCl}_3$ )  $\delta$  0.78 (3H, s), 0.87 (3H, s), 1.00 (3H, s), 1.10-1.41 (7H, m), 1.48 (6H, s), 1.48-1.70 (2H, m), 1.80-1.95 (4H, m), 2.32 (1H, dt,  $J = 13.7, 3.06$  Hz), 2.65-2.85 (2H, m), 3.23-3.28 (1H, m), 3.81-3.85 (1H, m), 4.79-4.81 (1H, br s), 7.48-7.50 (1H, m), 7.50-7.61 (2H, m), 7.98-8.10 (1H, m);  $^{13}\text{C}$  NMR (100.6 MHz,  $\text{CDCl}_3$ )  $\delta$  18.4 ( $\text{CH}_2$ ), 18.4 ( $\text{CH}_3$ ), 20.4 ( $\text{CH}_2$ ), 21.8 ( $\text{CH}_3$ ), 22.1 ( $\text{CH}_3$ ), 25.1 ( $\text{CH}_2$ ), 25.8 ( $\text{CH}_3$ ), 32.9 ( $\text{CH}_3$ ), 33.4 (C), 34.5 ( $\text{CH}_2$ ), 36.6 (C), 38.4 ( $\text{CH}_2$ ), 38.5 ( $\text{CH}_2$ ), 42.2 ( $\text{CH}_2$ ), 47.1 (CH), 48.5 ( $\text{CH}_2$ ), 55.0 (CH), 71.3 (C), 120.0 (CH), 123.4 (CH), 130.7 (CH), 131.0 (CH), 132.8 (CH), 132.8 (CH), 135.1 (C), 148.4 (C); HRMS (ESI) calcd for  $\text{C}_{26}\text{H}_{39}\text{N}_2\text{O}_4\text{S}[\text{M}+\text{H}]^+$  475.2631, found 475.2652. Anal. Calcd for  $\text{C}_{26}\text{H}_{38}\text{N}_2\text{O}_4\text{S}$ : C, 65.79; H, 8.07; N, 5.90. Found: C, 65.69 H, 8.03; N, 5.95.

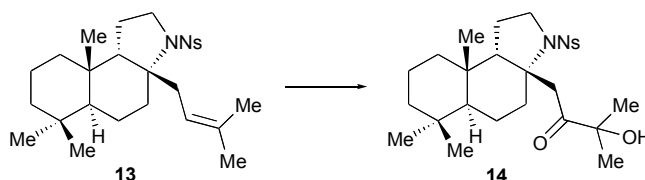

**3-Hydroxy-3-methyl-1-((3aS\*,5aS\*,9aS\*,9bS\*)-6,6,9a-trimethyl-3-(2-nitrobenzenesulfonyl)perhydro-1H-benzo[e]indol-3a-yl)butan-2-one (14).** *N*-Methylmorpholine *N*-oxide (78.0 mg, 0.632 mmol) and osmium(IV) tetroxide (0.20 mL, 31.6  $\mu$ mol) was added to a

stirred solution of **13** (150 mg, 0.316 mmol) in (MeCN/H<sub>2</sub>O 4:1, 3.2 mL) at room temperature under argon. After stirring for 17 h at room temperature, the reaction was quenched with saturated aqueous Na<sub>2</sub>S<sub>2</sub>O<sub>3</sub> (4.0 mL) at 0 °C, and the resulting mixture was extracted with Et<sub>2</sub>O (3 x 10 mL). The combined extracts were washed with brine, then dried over MgSO<sub>4</sub>, filtered, and concentrated under reduced pressure. The residue was roughly purified by silica gel flash column chromatography (hexane/EtOAc 4:1) to afford a yellow oil, which was used in the next step without further purification. *N*-Methylmorpholine *N*-oxide (57.0 mg, 0.474 mmol) and MS4A were added to a stirred solution of the above residue in MeCN (2.7 mL) at room temperature under argon. After stirring for 15 min, a solution of TPAP (5.70 mg, 15.8 μmol) in MeCN (0.5 mL) was added dropwise to the above mixture. After stirring for 1 h, the solvent was removed under reduced pressure. The residue was diluted with CHCl<sub>3</sub> and through a Celite pad and the filtrate was concentrated under reduced pressure. The residue was purified by silica gel flash column chromatography (hexane/AcOEt 2:1) to give **14** (115 mg, 72% from **13**) as a yellow oil. IR (neat) 3493, 1713, 1545cm<sup>-1</sup>; <sup>1</sup>H NMR (400MHz, CDCl<sub>3</sub>) δ 0.77 (3H, s), 0.85 (3H, s), 1.02 (3H, s), 1.13-1.28 (5H, m), 1.34 (6H, s), 1.34-1.41 (2H, m), 1.55-1.77 (2H, m), 1.78 (1H, td, *J* = 13.6, 4.1 Hz), 1.87-2.03 (2H, m), 2.17-2.20 (1H, m), 2.67 (1H, dd, *J* = 12.9, 6.35 Hz), 3.40-3.47 (3H, m), 3.73-3.81 (1H, m) 7.51-7.53 (1H, m), 7.61-7.64 (2H, m), 7.85-7.87 (1H, m); <sup>13</sup>C NMR (100.6 MHz, CDCl<sub>3</sub>) δ 18.3 (CH<sub>2</sub>), 20.1 (CH<sub>2</sub>), 21.7 (CH<sub>2</sub>), 23.4 (CH<sub>2</sub>), 25.7 (CH<sub>2</sub>), 27.1 (CH<sub>3</sub>, 2 carbons), 32.9 (C), 33.3 (CH<sub>3</sub>), 36.5 (C), 38.2 (CH<sub>2</sub>), 38.7 (CH<sub>2</sub>), 41.3 (CH<sub>2</sub>), 42.0 (CH<sub>2</sub>), 47.1 (CH), 48.7 (CH<sub>2</sub>), 54.5 (CH), 68.2 (C), 123.9 (CH), 130.1 (CH), 131.4 (CH), 133.2 (CH), 134.7 (C), 148.3 (C), 213.1 (C); HRMS (ESI) calcd for C<sub>26</sub>H<sub>39</sub>N<sub>2</sub>O<sub>6</sub>S [M+H]<sup>+</sup> 507.2529, found 507.2503.

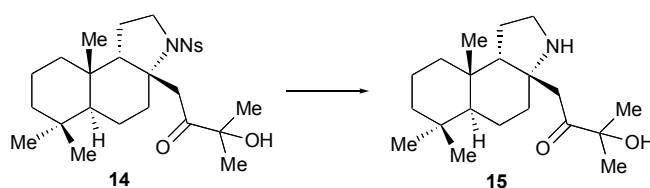

**3-Hydroxy-3-methyl-1-((3aS\*,5aS\*,9aS\*,9bS\*)-6,6,9a-trimethylperhydro-1H-benzo[*e*]indol-3a-yl)butan-2-one (15).** Thiophenol (56.0 μL, 0.109 mmol) and 5 M aqueous KOH (87.0 μL, 0.436 mmol) were added dropwise to a stirred solution of **14** (55.2 mg, 0.109 mmol) in MeCN (1.1 mL) at 0 °C under argon. After stirring for 17 h at room temperature, the mixture was directly purified by silica gel flash column chromatography

(CHCl<sub>3</sub>/MeOH/NH<sub>4</sub>OH 100:9:1) to give **15** (25.6 mg, 73%) as a yellow oil. IR (neat) 3314, 1702 cm<sup>-1</sup>; <sup>1</sup>H NMR (400MHz, CDCl<sub>3</sub>) δ 0.81 (3H, s), 0.88 (3H, s), 1.12 (3H, s), 1.14-1.18 (2H, m), 1.23 (3H, s), 1.26 (3H, s), 1.28-1.42 (6H, m), 1.50-1.60 (1H, m), 1.60-1.76 (1H, m), 1.76-1.90 (3H, m), 1.98-2.05 (1H, m), 2.71 (1H, d, *J* = 11.5 Hz), 2.76-2.83 (1H, m), 3.01-3.06 (1H, m) 3.22 (1H, d, *J* = 11.5 Hz); <sup>13</sup>C NMR (100.6 MHz, CDCl<sub>3</sub>) δ 18.4 (CH<sub>2</sub>), 20.0 (CH<sub>2</sub>), 21.8 (CH<sub>3</sub>), 23.0 (CH<sub>3</sub>), 26.5 (CH<sub>3</sub>), 26.8 (CH<sub>3</sub>), 27.8 (CH<sub>2</sub>), 33.0 (C), 33.5 (CH<sub>3</sub>), 36.1 (C), 37.0 (CH<sub>2</sub>), 38.7 (CH<sub>2</sub>), 42.2 (CH<sub>2</sub>), 43.1 (CH<sub>2</sub>), 46.6 (CH<sub>2</sub>), 47.4 (CH), 59.2 (CH), 62.5 (C), 76.2 (C), 216.6 (C); HRMS (ESI) calcd for C<sub>20</sub>H<sub>36</sub>NO<sub>2</sub>[M+H]<sup>+</sup> 322.2746, found 322.2726.

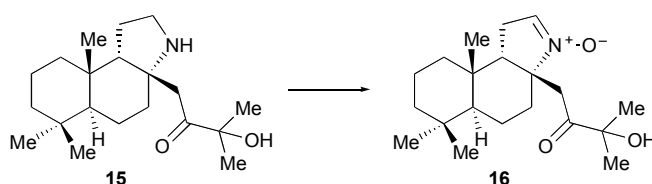

**(3aS\*,5aS\*,9aS\*,9bS\*)-3a-(3-Hydroxy-3-methyl-2-oxobutyl)-6,6,9a-trimethyl-3a,4,5,5a,6,7,8,9,9a,9b-decahydro-1H-benzo[*e*]indole 3-oxide (16).** Na<sub>2</sub>WO<sub>4</sub>·2H<sub>2</sub>O (14.4 mg, 43.6 μmol) was added to a stirred solution of **15** (28.0 mg, 87.1 μmol) in MeOH (870 μL) at room temperature under argon. After cooling at 0 °C, 30% H<sub>2</sub>O<sub>2</sub> (30.0 μL, 0.261 mmol) was added dropwise to the mixture. The resulting mixture was gradually warmed to room temperature over 30 min. After stirring for an additional 1 h at room temperature, the reaction was extracted with CHCl<sub>3</sub> (3 x 10 mL). The combined extracts were washed with brine, then dried over MgSO<sub>4</sub>, filtered, and concentrated under reduced pressure. The residue was roughly purified by silica gel flash column chromatography (CHCl<sub>3</sub>/MeOH 40:1) to afford **16** (25.2 mg, 86%) as a yellow oil. IR (neat) 3348, 1714 cm<sup>-1</sup>; <sup>1</sup>H NMR (400MHz, CDCl<sub>3</sub>) δ 0.84 (3H, s), 0.93 (3H, s), 1.13 (3H, s), 1.13-1.25 (2H, m), 1.27 (3H, s), 1.27-1.35 (2H, m), 1.37 (3H, s), 1.43-1.55 (2H, m), 1.63-1.70 (4H, m), 2.50-2.60 (4H, m), 3.07 (1H, d, *J* = 14.4 Hz), 3.24 (1H, d, *J* = 14.5 Hz), 5.04 (1H, s), 6.81 (1H, t, *J* = 2.34 Hz); <sup>13</sup>C NMR (100.6 MHz, CDCl<sub>3</sub>) δ 18.0 (CH<sub>2</sub>), 18.2 (CH<sub>2</sub>), 21.9 (CH<sub>3</sub>), 23.0 (CH<sub>3</sub>), 26.3 (CH<sub>3</sub>), 26.5 (CH<sub>3</sub>), 28.7 (CH<sub>2</sub>), 32.9 (C), 33.4 (CH<sub>3</sub>), 35.8 (C), 35.9 (CH<sub>2</sub>), 36.9 (CH<sub>2</sub>), 38.7 (CH<sub>2</sub>), 42.0 (CH<sub>2</sub>), 48.4 (CH), 53.6 (CH), 53.6 (C), 78.5 (C), 133.4 (CH), 214.2 (C); HRMS (ESI) calcd for C<sub>20</sub>H<sub>34</sub>NO<sub>3</sub>[M+H]<sup>+</sup> 336.2539, found 336.2545.

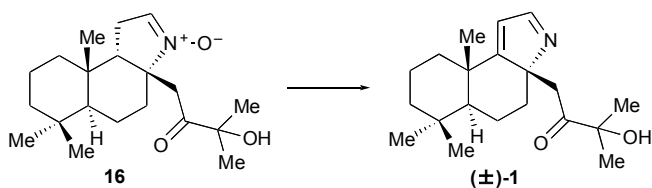

**(±)-Chamobtusin A (1).** Benzoyl chloride (1.71 µL, 14.7 µmol) was added to a stirred, refluxing solution of **16** (4.50 mg, 13.4 µmol) in pyridine (600 µL) under argon. After stirring for 1h at reflux, the solvent was removed under reduced pressure. The residue was purified by silica gel flash column chromatography (CHCl<sub>3</sub>/MeOH 20:1) to give (±)-chamobtusin A (**1**) (2.30 mg, 54%) as a yellow solid. IR (neat) 3334, 2929, 1710, 1604, 1518, 1464, 1374, 1236 cm<sup>-1</sup>; <sup>1</sup>H NMR (400MHz, CDOD<sub>3</sub>) δ 0.61-0.70 (2H, m), 0.83 (3H, s), 0.92 (3H, s), 1.10 (3H, s), 1.15 (3H, s), 1.16 (3H, s), 1.39-1.79 (9H, m), 2.54-2.58 (1H, m), 3.32 (1H, d, *J* = 17.8 Hz), 3.47 (1H, d, *J* = 17.8 Hz), 6.03 (1H, s), 7.90 (1H, s); <sup>13</sup>C NMR (100.6 MHz, CDOD<sub>3</sub>) δ 17.6 (CH<sub>3</sub>), 19.8 (CH<sub>2</sub>), 20.6 (CH<sub>2</sub>), 22.4 (CH<sub>3</sub>), 27.1 (CH<sub>3</sub>, 2 carbons), 34.5 (CH<sub>3</sub>), 35.2 (C), 39.1 (CH<sub>2</sub>), 41.8 (C), 42.4 (CH<sub>2</sub>), 42.8 (CH<sub>2</sub>), 43.5 (CH<sub>2</sub>), 59.9 (CH), 78.2 (C), 81.1 (C), 118.4 (CH), 166.0 (CH), 184.8 (C), 213.9 (C); HRMS (ESI) calcd for C<sub>20</sub>H<sub>32</sub>NO<sub>2</sub>[M+H]<sup>+</sup> 318.2433, found 318.2447.

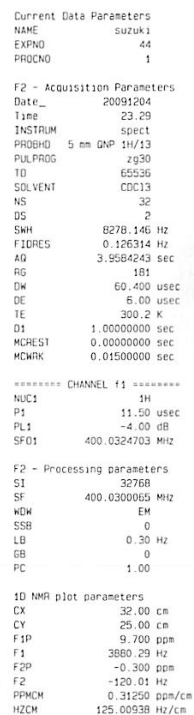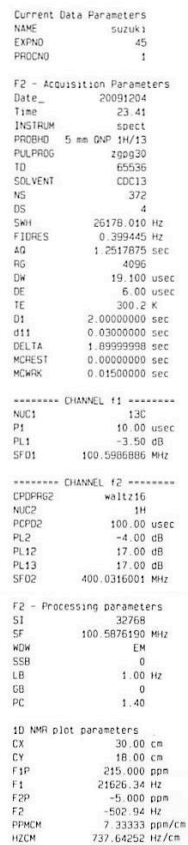



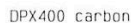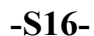



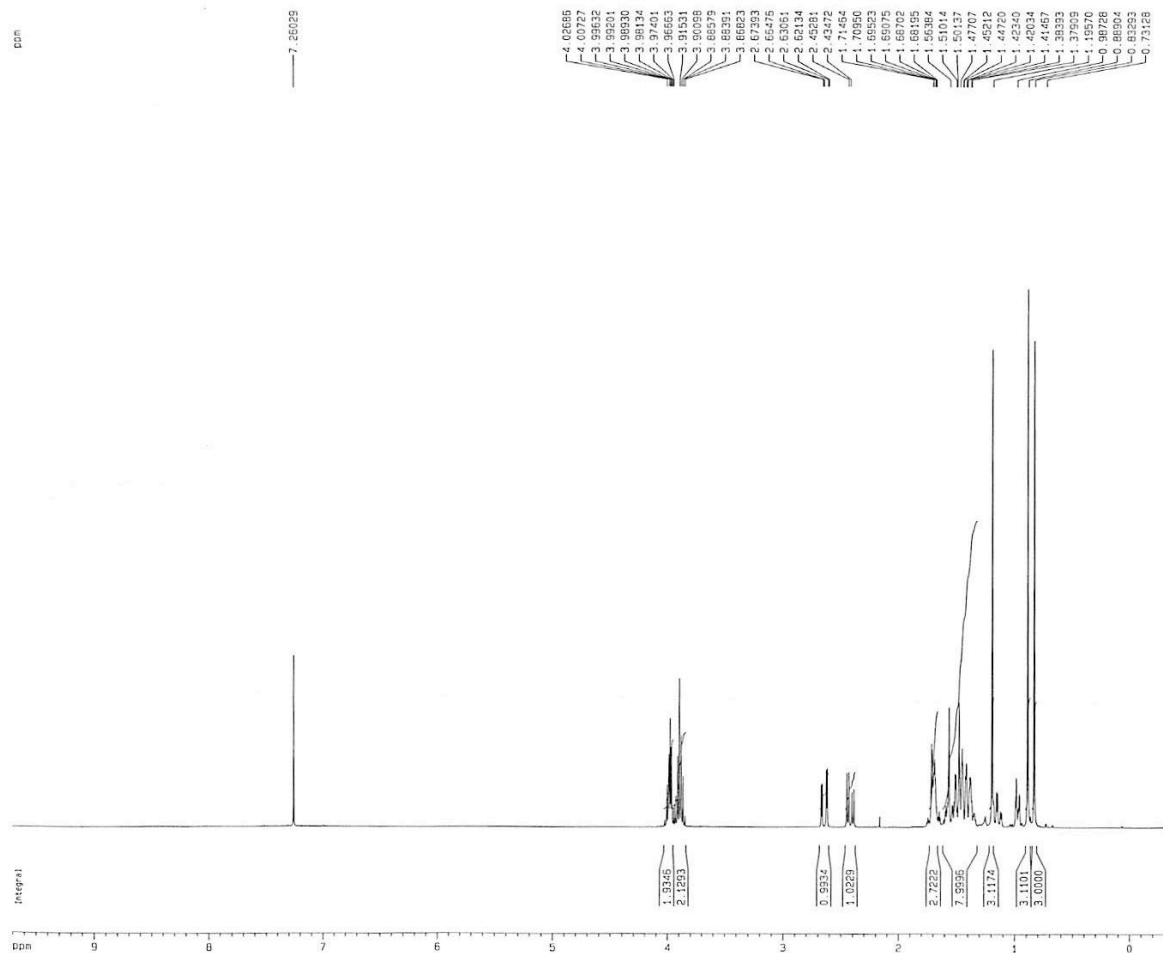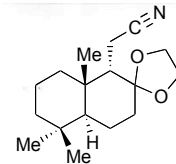

Current Data Parameters  
NAME suzuk1  
EXPNO 1  
PROCNO 1

F2 - Acquisition Parameters  
Date\_ 20091114  
Time 20.23  
INSTRUM spect  
PROBHD 5 mm QNP 1H/13  
PULPROG zg30  
TD 65536  
SOLVENT CDCl3  
NS 32  
DS 2  
SWH 8276.146 Hz  
FIDRES 0.126314 Hz  
AQ 3.9584243 sec  
RG 256  
RW 60.400 usec  
DE 6.00 usec  
TE 300.2 K  
D1 1.00000000 sec  
MCREST 0.00000000 sec  
MCWRK 0.01500000 sec

\*\*\*\*\* CHANNEL f1 \*\*\*\*\*  
NUC1 1H  
P1 11.50 usec  
PL1 -4.00 dB  
SFO1 400.0324703 MHz

F2 - Processing parameters  
SI 32768  
SF 400.0300065 MHz  
WDW EM  
SSB 0  
LB 0.30 Hz  
GB 0  
PC 1.00

1D NMR plot parameters  
CX 32.00 cm  
CY 15.00 cm  
F1P 9.700 ppm  
F1 3880.29 Hz  
F2P -0.300 ppm  
F2 -120.01 Hz  
PPMCM 0.31250 ppm/cm  
HZCM 125.00938 Hz/cm

DPX400 carbon

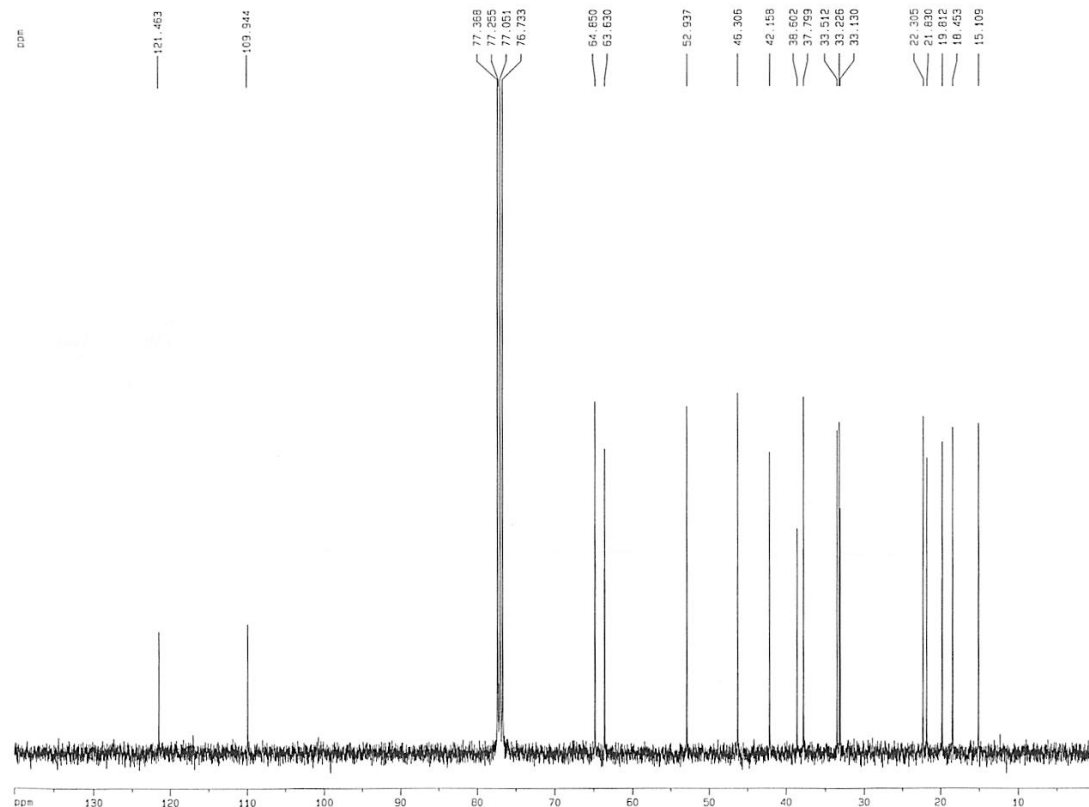

Current Data Parameters  
NAME suzuk1  
EXPNO 2  
PROCNO 1

F2 - Acquisition Parameters  
Date\_ 20091114  
Time 20.43  
INSTRUM spect  
PROBHD 5 mm QNP 1H/13  
PULPROG zgpg30  
TD 65536  
SOLVENT CDCl3  
NS 440  
DS 4  
SWH 25178.010 Hz  
FIDRES 0.399445 Hz  
AQ 1.2517875 sec  
RG 8192  
DW 19.100 usec  
DE 6.00 usec  
TE 300.2 K  
D1 2.00000000 sec  
d11 0.03000000 sec  
DELTA 1.89999999 sec  
MCREST 0.00000000 sec  
MCWRK 0.01500000 sec

\*\*\*\*\* CHANNEL f1 \*\*\*\*\*  
NUC1 13C  
P1 10.00 usec  
PL1 -3.50 dB  
SFO1 100.5986686 MHz

\*\*\*\*\* CHANNEL f2 \*\*\*\*\*  
CPDPRG2 waltz16  
NUC2 1H  
P2 100.00 usec  
PL2 -4.00 dB  
PL12 17.00 dB  
PL13 17.00 dB  
SFO2 400.0316001 MHz

F2 - Processing parameters  
SI 32768  
SF 100.5876198 MHz  
WDW EM  
SSB 0  
LB 1.00 Hz  
GB 0  
PC 1.40

1D NMR plot parameters  
CX 30.00 cm  
CY 10.00 cm  
F1P 140.000 ppm  
F1 14082.27 Hz  
F2P 0.000 ppm  
F2 0.00 Hz  
PPMCM 4.66667 ppm/cm  
HZCM 469.40587 Hz/cm

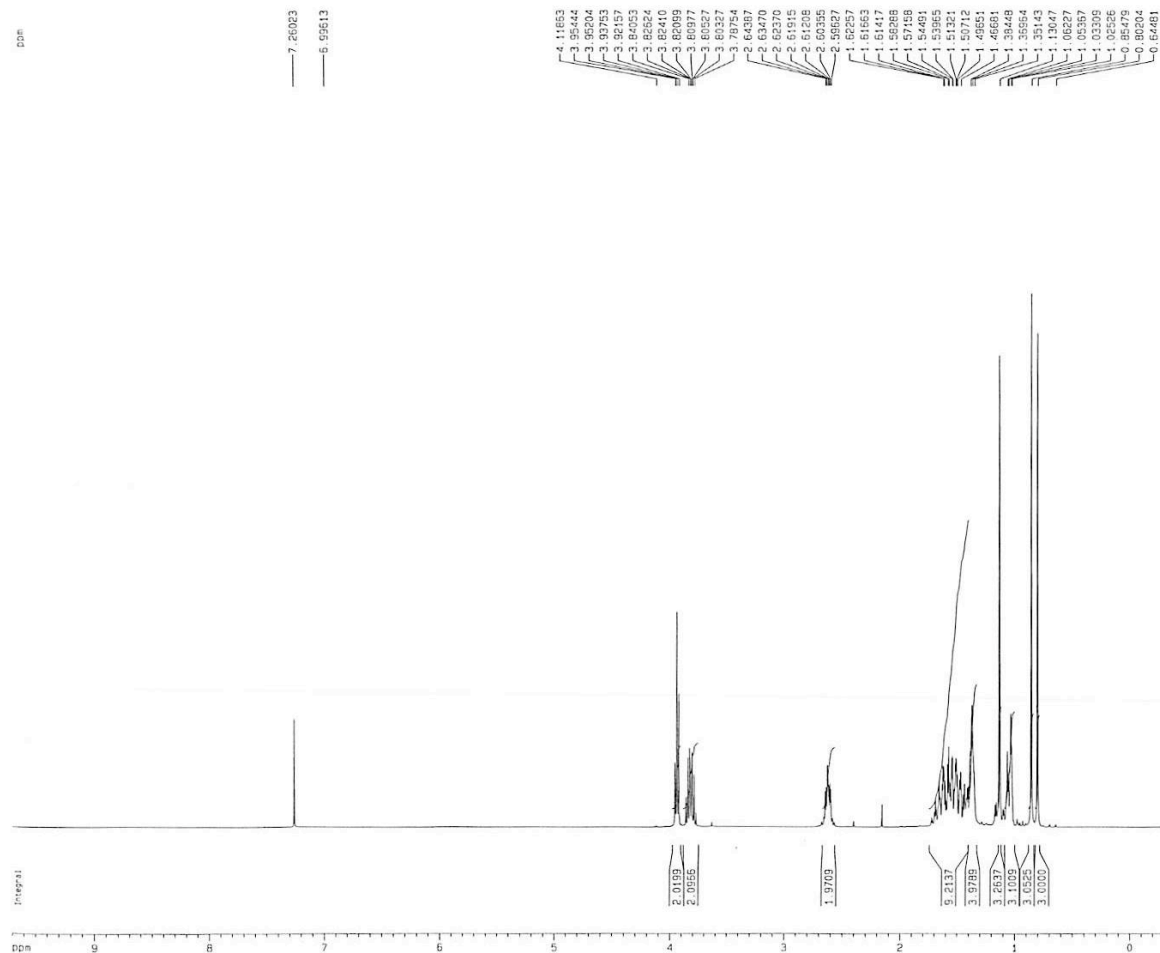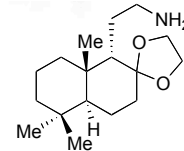

Current Data Parameters  
NAME suzuk1  
EXPNO 9  
PROCNO 1

F2 - Acquisition Parameters  
Date\_ 20091114  
Time 22.26  
INSTRUM spect  
PROBHD 5 mm QNP 1H/13  
PULPROG zg30  
TD 65536  
SOLVENT CDCl3  
NS 32  
DS 2  
SWH 8278.146 Hz  
FIDRES 0.126314 Hz  
AQ 3.9584243 sec  
RG 143.7  
DW 60.400 usec  
DE 6.00 usec  
TE 300.2 K  
D1 1.00000000 sec  
MCREST 0.00000000 sec  
MCWRR 0.01500000 sec

\*\*\*\*\* CHANNEL f1 \*\*\*\*\*  
NUC1 1H  
P1 11.50 usec  
PL1 -4.00 dB  
SFO1 400.0324703 MHz

F2 - Processing parameters  
SI 32768  
SF 400.0300055 MHz  
WDW EM  
SSB 0  
LB 0.30 Hz  
GB 0  
PC 1.00

1D NMR plot parameters  
CX 32.00 cm  
CY 15.00 cm  
F1P 9.700 ppm  
F1 3860.29 Hz  
F2P -0.300 ppm  
F2 -120.01 Hz  
PPHCH 0.31250 ppm/cm  
HZCM 125.00938 Hz/cm

DPX400 carbon

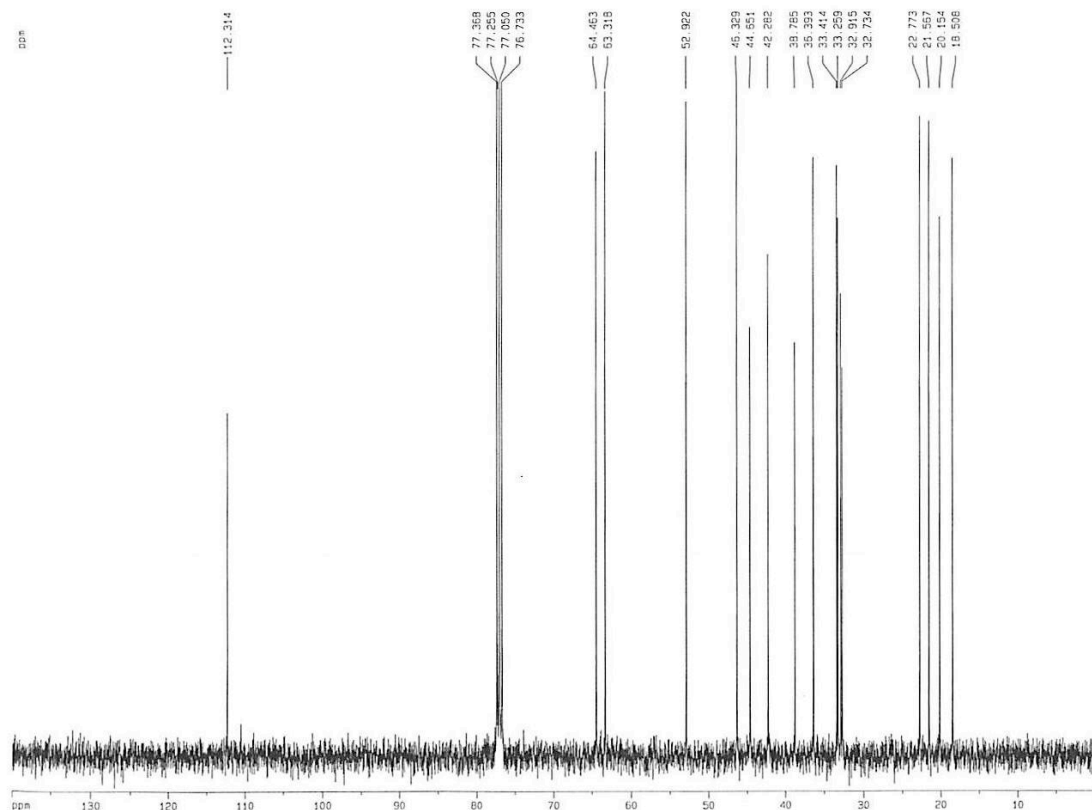

Current Data Parameters  
NAME suzuk1  
EXPNO 10  
PROCNO 1

F2 - Acquisition Parameters  
Date\_ 20091114  
Time 22.39  
INSTRUM spect  
PROBHD 5 mm QNP 1H/13  
PULPROG zgpg30  
TD 65536  
SOLVENT CDCl3  
NS 192  
DS 4  
SWH 26178.010 Hz  
FIDRES 0.399445 Hz  
AQ 1.2517875 sec  
RG 2580.3  
DW 19.100 usec  
DE 6.00 usec  
TE 300.2 K  
D1 2.00000000 sec  
D11 0.03000000 sec  
DELTA 1.89999998 sec  
MCREST 0.00000000 sec  
MCWRR 0.01500000 sec

\*\*\*\*\* CHANNEL f1 \*\*\*\*\*  
NUC1 13C  
P1 10.00 usec  
PL1 -3.50 dB  
SFO1 100.5966886 MHz

\*\*\*\*\* CHANNEL f2 \*\*\*\*\*  
CPDPRG2 waltz16  
NUC2 1H  
PCPD2 100.00 usec  
PL2 -4.00 dB  
PL12 17.00 dB  
PL13 17.00 dB  
SFO2 400.0316001 MHz

F2 - Processing parameters  
SI 32768  
SF 100.5876206 MHz  
WDW EM  
SSB 0  
LB 1.00 Hz  
GB 0  
PC 1.40

1D NMR plot parameters  
CX 30.00 cm  
CY 19.00 cm  
F1P 140.000 ppm  
F1 14082.27 Hz  
F2P 0.000 ppm  
F2 0.00 Hz  
PPHCH 4.66667 ppm/cm  
HZCM 469.40891 Hz/cm

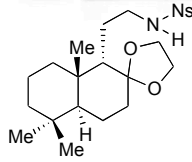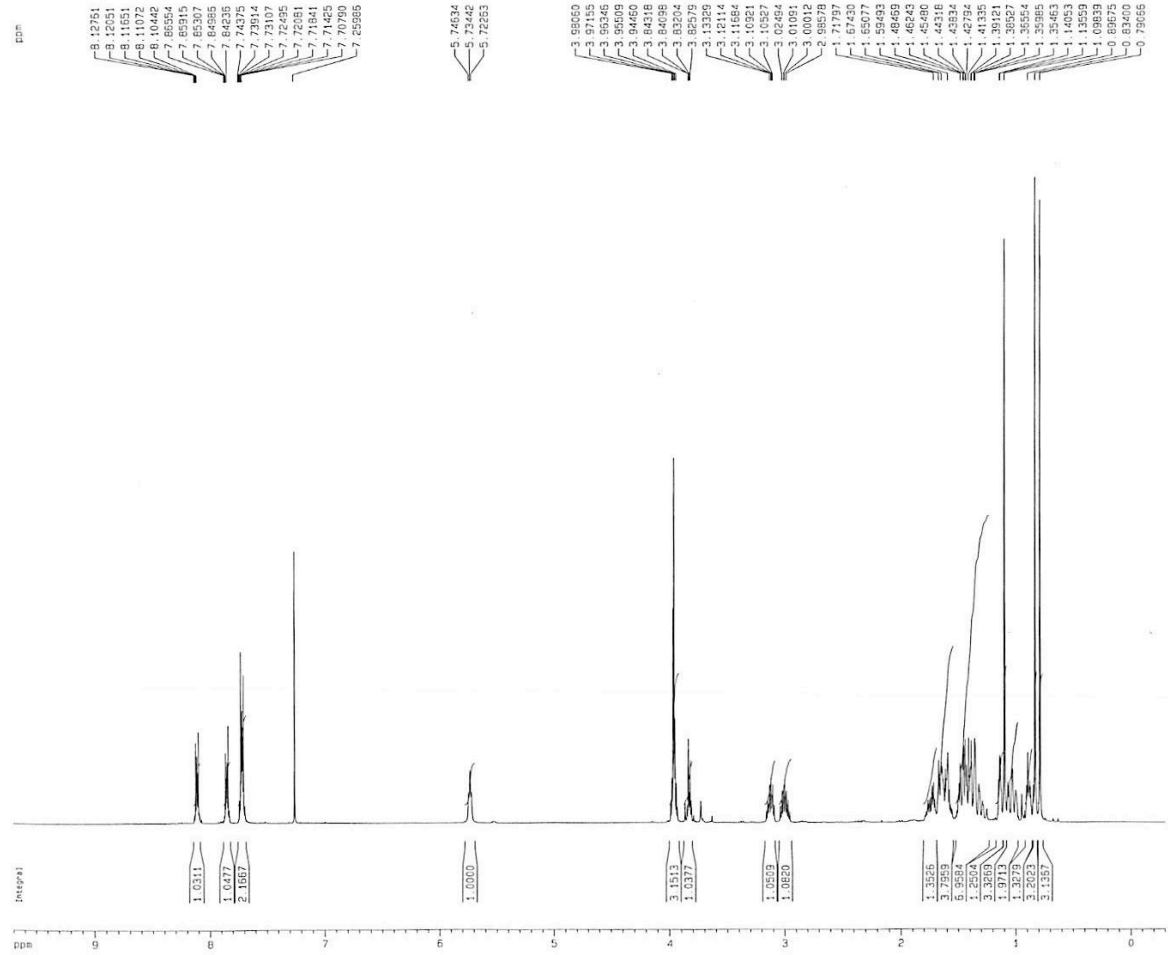

Current Data Parameters  
NAME suzuk1  
EXPNO 12  
PROCNO 1

F2 - Acquisition Parameters  
Date\_ 20091114  
Time 23.11  
INSTRUM spect  
PROBHD 5 mm QNP 1H/13  
PULPROG zgpg30  
TD 65536  
SOLVENT CDCl3  
NS 32  
DS 2  
SWH 8278.146 Hz  
FIDRES 0.126314 Hz  
AQ 3.9584243 sec  
RG 161.3  
OW 60.400 usec  
DE 6.00 usec  
TE 300.2 K  
D1 1.00000000 sec  
MCREST 0.00000000 sec  
MCWRR 0.01500000 sec

----- CHANNEL f1 -----  
NUC1 1H  
P1 11.50 usec  
PL1 -4.00 dB  
SFO1 400.0324703 MHz

F2 - Processing parameters  
SI 32768  
SF 400.0300067 MHz  
WDW EM  
SSB 0  
LB 0.30 Hz  
GB 0  
PC 1.00

1D NMR plot parameters  
CX 32.00 cm  
CY 18.00 cm  
F1P 9.700 ppm  
F1 3860.29 Hz  
F2P -0.300 ppm  
F2 -120.01 Hz  
PPMCM 0.31250 ppm/cm  
HZCM 125.00938 Hz/cm

DPX400 carbon

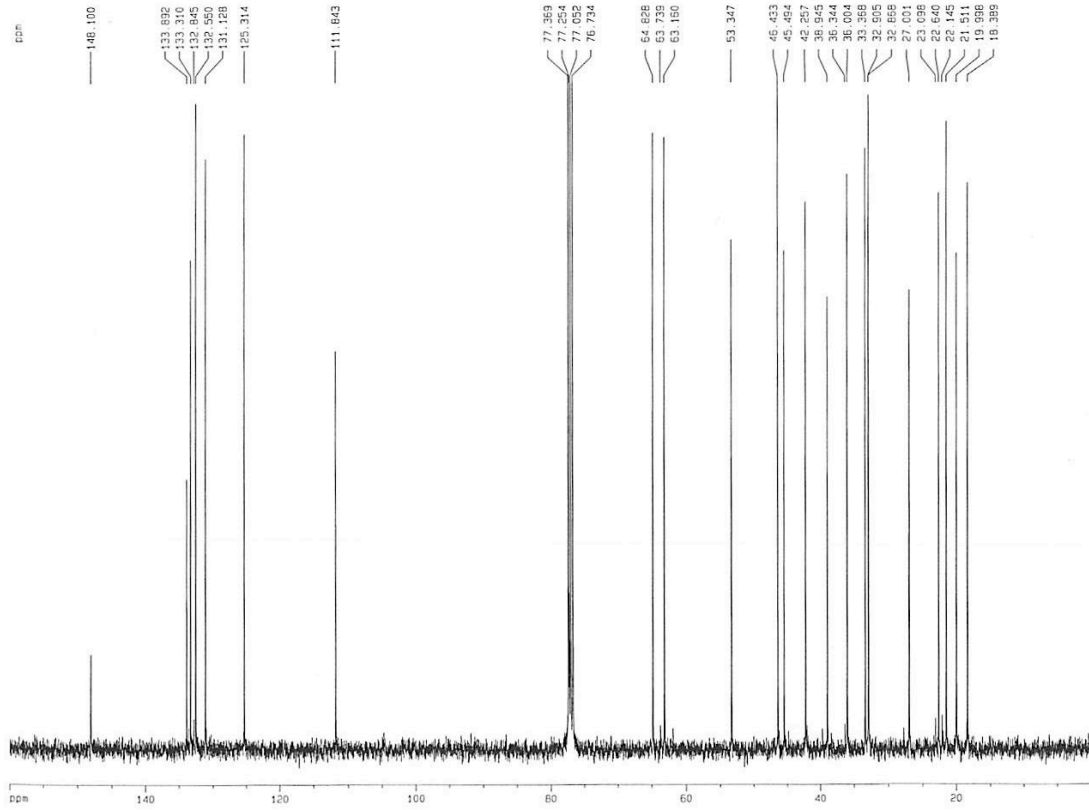

Current Data Parameters  
NAME suzuk1  
EXPNO 13  
PROCNO 1

F2 - Acquisition Parameters  
Date\_ 20091114  
Time 23.23  
INSTRUM spect  
PROBHD 5 mm QNP 1H/13  
PULPROG zgpg30  
TD 65536  
SOLVENT CDCl3  
NS 1230  
DS 4  
SWH 26178.010 Hz  
FIDRES 0.399445 Hz  
AQ 1.2517875 sec  
RG 3251  
OW 19.100 usec  
DE 6.00 usec  
TE 300.2 K  
D1 2.00000000 sec  
d11 0.03000000 sec  
DELTA 1.89999998 sec  
MCREST 0.00000000 sec  
MCWRR 0.01500000 sec

----- CHANNEL f1 -----  
NUC1 13C  
P1 10.00 usec  
PL1 -3.50 dB  
SFO1 100.5986886 MHz

----- CHANNEL f2 -----  
CPDPRG2 waltz16  
NUC2 1H  
PCPD2 100.00 usec  
PL2 -4.00 dB  
PL12 17.00 dB  
PL13 17.00 dB  
SFO2 400.516001 MHz

F2 - Processing parameters  
SI 32768  
SF 100.5876206 MHz  
WDW EM  
SSB 0  
LB 1.00 Hz  
GB 0  
PC 1.40

1D NMR plot parameters  
CX 30.00 cm  
CY 19.00 cm  
F1P 160.000 ppm  
F1 16094.02 Hz  
F2P 0.000 ppm  
F2 0.00 Hz  
PPMCM 5.33333 ppm/cm  
HZCM 536.46735 Hz/cm

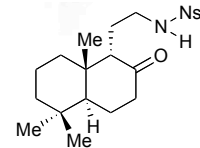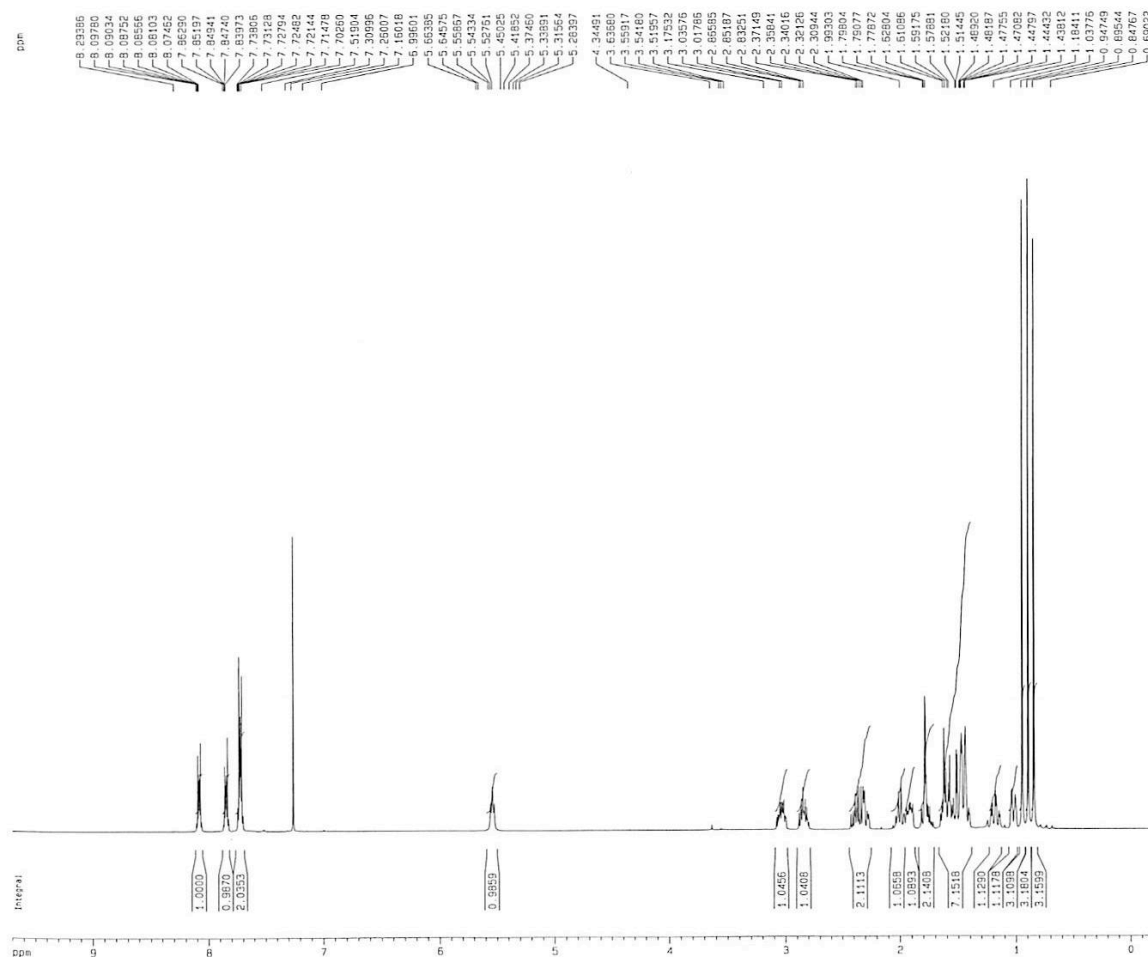

Current Data Parameters  
NAME suzuki1  
EXPNO 24  
PROCNO 1

F2 - Acquisition Parameters  
Date\_ 20091115  
Time 4.09  
INSTRUM spect  
PROBHD 5 mm QNP 1H/13  
PULPROG zgpg30  
TD 65536  
SOLVENT CDCl3  
NS 32  
DS 2  
SWH 8278.146 Hz  
FIDRES 0.126314 Hz  
AQ 3.9584243 sec  
RG 203.2  
DW 60.400 usec  
DE 6.00 usec  
TE 300.2 K  
D1 1.00000000 sec  
MCREST 0.00000000 sec  
MCWRK 0.01500000 sec

\*\*\*\*\* CHANNEL f1 \*\*\*\*\*  
NUC1 1H  
P1 11.50 usec  
PL1 -4.00 dB  
SFO1 400.0324703 MHz

F2 - Processing parameters  
SI 32768  
SF 400.0300065 MHz  
WDW EM  
SSB 0  
LB 0.30 Hz  
GB 0  
PC 1.00

1D NMR plot parameters  
CX 32.00 cm  
CY 18.00 cm  
F1P 9.700 ppm  
F1 3880.29 Hz  
F2P -0.300 ppm  
F2 -120.01 Hz  
PPMCM 0.31250 ppm/cm  
HZCM 125.00938 Hz/cm

DPX400 carbon

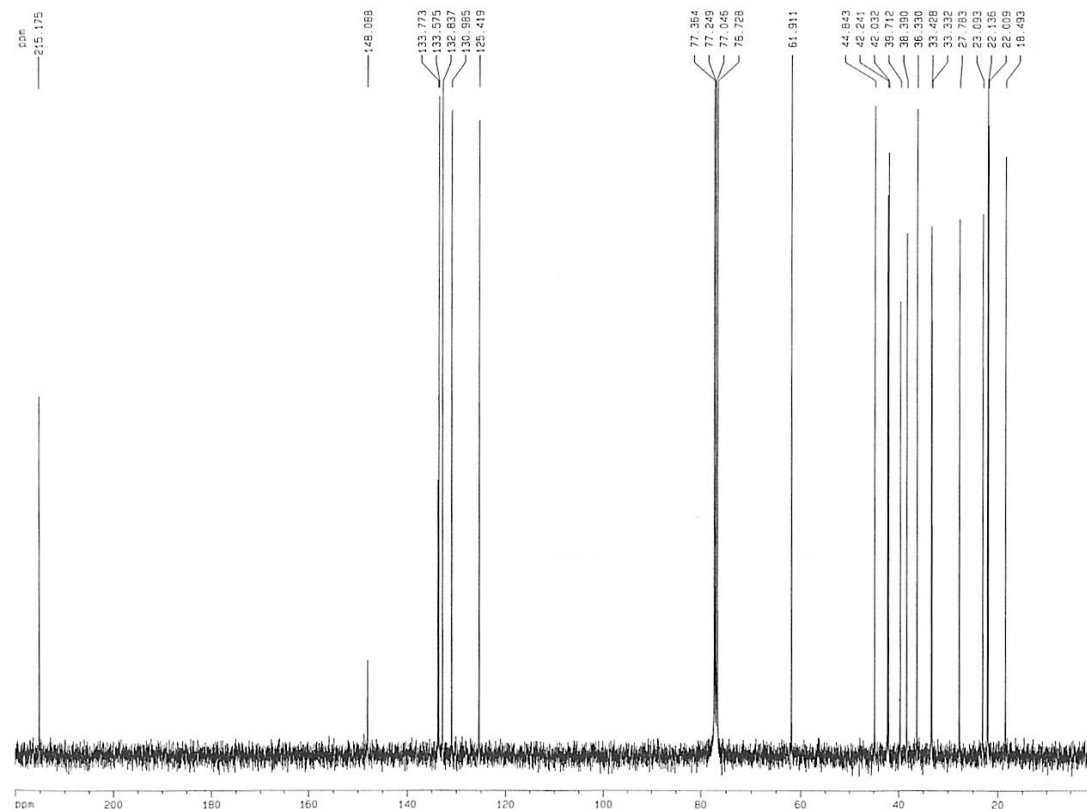

Current Data Parameters  
NAME suzuki1  
EXPNO 25  
PROCNO 1

F2 - Acquisition Parameters  
Date\_ 20091115  
Time 4.17  
INSTRUM spect  
PROBHD 5 mm QNP 1H/13  
PULPROG zgpg30  
TD 65536  
SOLVENT CDCl3  
NS 1029  
DS 4  
SWH 26178.010 Hz  
FIDRES 0.399445 Hz  
AQ 1.2517875 sec  
RG 8192  
DW 19.100 usec  
DE 6.00 usec  
TE 300.2 K  
D1 2.00000000 sec  
d11 0.03000000 sec  
DELTA 1.69999998 sec  
MCREST 0.00000000 sec  
MCWRK 0.01500000 sec

\*\*\*\*\* CHANNEL f1 \*\*\*\*\*  
NUC1 13C  
P1 10.00 usec  
PL1 -3.50 dB  
SFO1 100.5966886 MHz

\*\*\*\*\* CHANNEL f2 \*\*\*\*\*  
CPDPRG2 waltz16  
NUC2 1H  
PCPD2 100.00 usec  
PL2 -4.00 dB  
PL12 17.00 dB  
PL13 17.00 dB  
SFO2 400.0316001 MHz

F2 - Processing parameters  
SI 32768  
SF 100.5876214 MHz  
WDW EM  
SSB 0  
LB 1.00 Hz  
GB 0  
PC 1.40

1D NMR plot parameters  
CX 30.00 cm  
CY 19.00 cm  
F1P 220.000 ppm  
F1 22129.28 Hz  
F2P 0.000 ppm  
F2 0.00 Hz  
PPMCM 7.33333 ppm/cm  
HZCM 737.64258 Hz/cm

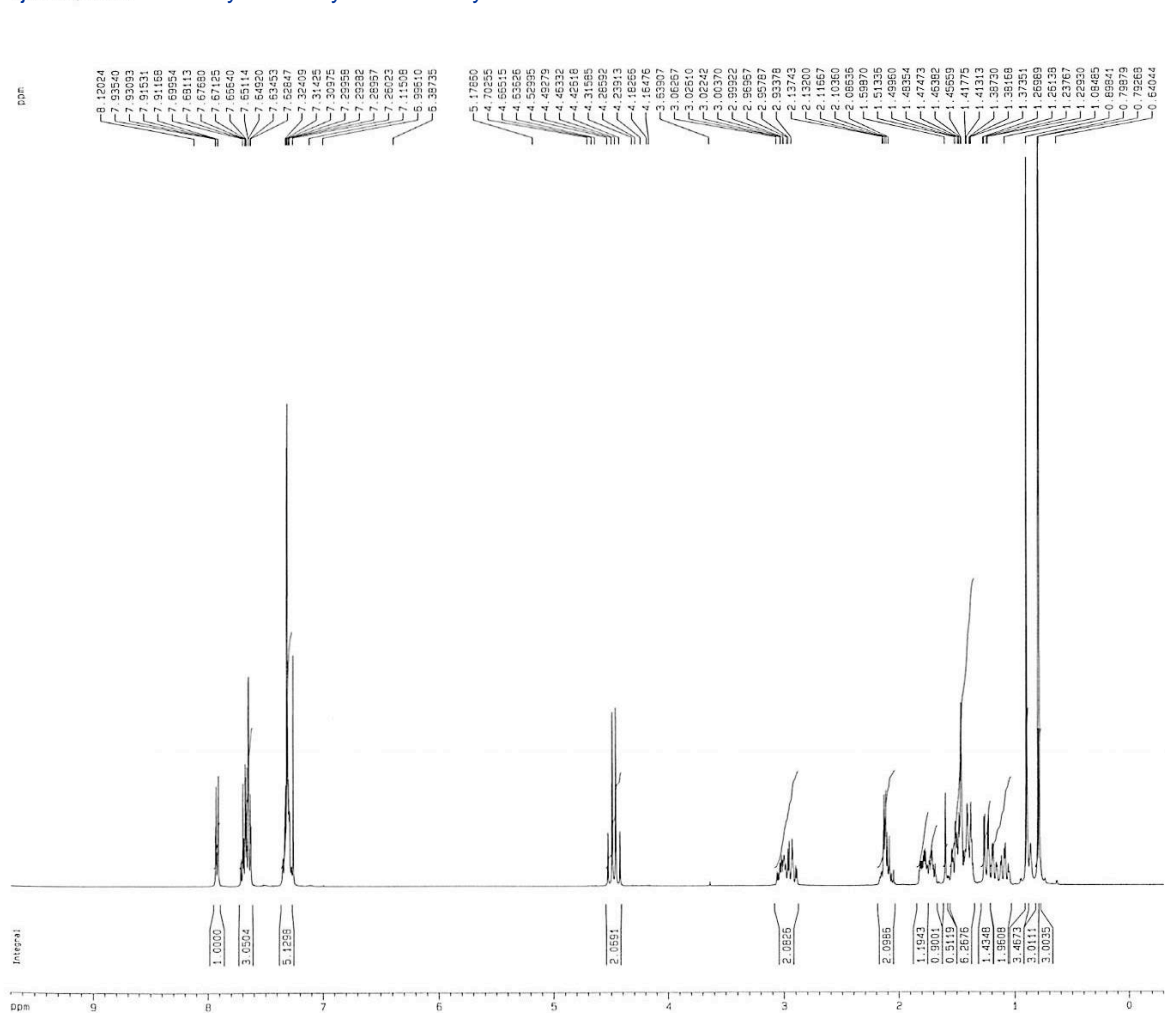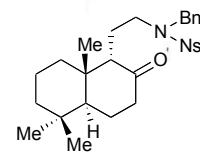

Current Data Parameters  
NAME suzuk1  
EXPNO 20  
PROCNO 1

F2 - Acquisition Parameters  
Date\_ 20091115  
Time 2.33  
INSTRUM spect  
PROBHD 5 mm QNP 1H/13  
PULPROG zg30  
TD 65536  
SOLVENT CDCl3  
NS 32  
DS 2  
SWH 8278.146 Hz  
FIDRES 0.126314 Hz  
AQ 3.9584243 sec  
RG 181  
OW 60.400 usec  
DE 6.00 usec  
TE 300.2 K  
D1 1.00000000 sec  
MCREST 0.00000000 sec  
MCWRK 0.01500000 sec

\*\*\*\*\* CHANNEL f1 \*\*\*\*\*  
NUC1 1H  
P1 11.50 usec  
PL1 -4.00 dB  
SFO1 400.0324703 MHz

F2 - Processing parameters  
SI 32768  
SF 400.0300065 MHz  
WDW EM  
SSB 0  
LB 0.30 Hz  
GB 0  
PC 1.00

1D NMR plot parameters  
CX 30.00 cm  
CY 21.00 cm  
F1P 9.700 ppm  
F1 3880.29 Hz  
F2P -0.300 ppm  
F2 -120.01 Hz  
PPMCH 0.31250 ppm/cm  
HZCM 125.00938 Hz/cm

DPX400 carbon

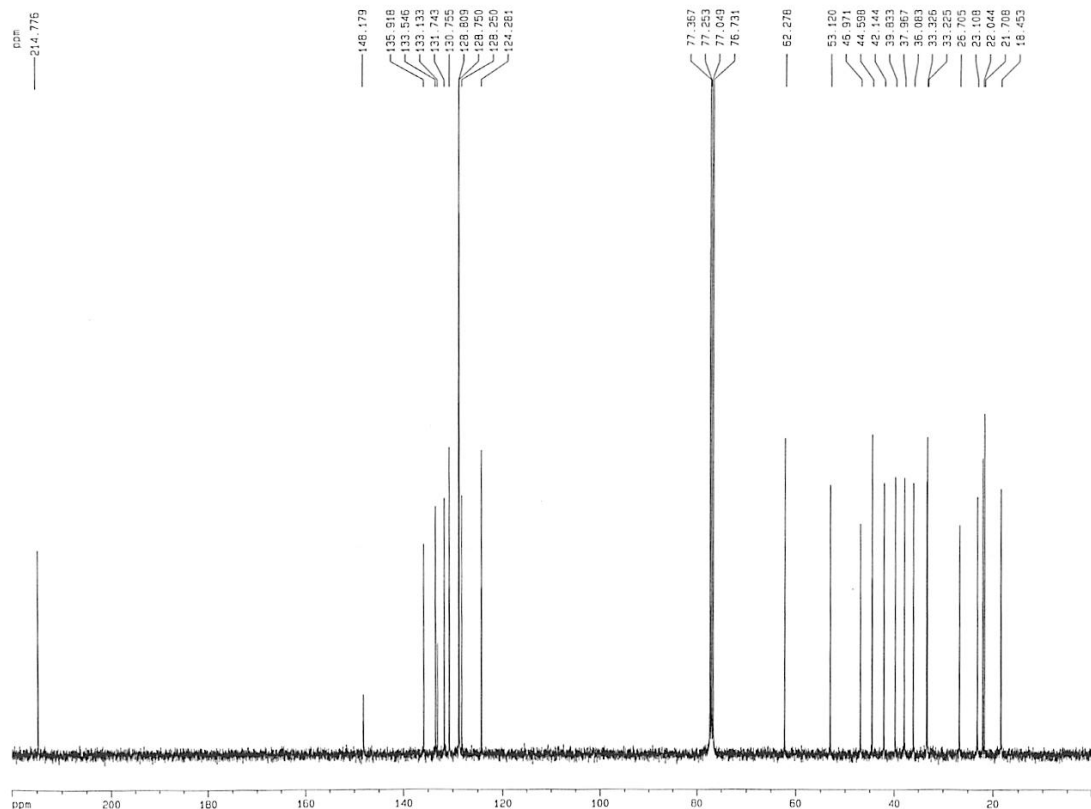

Current Data Parameters  
NAME suzuk1  
EXPNO 21  
PROCNO 1

F2 - Acquisition Parameters  
Date\_ 20091115  
Time 2.42  
INSTRUM spect  
PROBHD 5 mm QNP 1H/13  
PULPROG zgpg30  
TD 65536  
SOLVENT CDCl3  
NS 882  
DS 4  
SWH 26178.010 Hz  
FIDRES 0.399445 Hz  
AQ 1.2517875 sec  
RG 8192  
OW 19.100 usec  
DE 6.00 usec  
TE 300.2 K  
D1 2.00000000 sec  
d11 0.03000000 sec  
DELTA 1.89999998 sec  
MCREST 0.00000000 sec  
MCWRK 0.01500000 sec

\*\*\*\*\* CHANNEL f1 \*\*\*\*\*  
NUC1 13C  
P1 10.00 usec  
PL1 -3.50 dB  
SFO1 100.5986886 MHz

\*\*\*\*\* CHANNEL f2 \*\*\*\*\*  
CPDPRG2 waltz16  
NUC2 1H  
PCPD2 100.00 usec  
PL2 -4.00 dB  
PL12 17.00 dB  
PL13 17.00 dB  
SFO2 400.0316001 MHz

F2 - Processing parameters  
SI 32768  
SF 100.5876214 MHz  
WDW EM  
SSB 0  
LB 1.00 Hz  
GB 0  
PC 1.40

1D NMR plot parameters  
CX 30.00 cm  
CY 19.00 cm  
F1P 220.000 ppm  
F1 22129.28 Hz  
F2P 0.000 ppm  
F2 0.00 Hz  
PPMCH 7.33333 ppm/cm  
HZCM 737.64258 Hz/cm



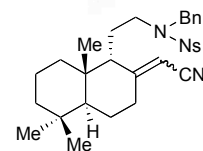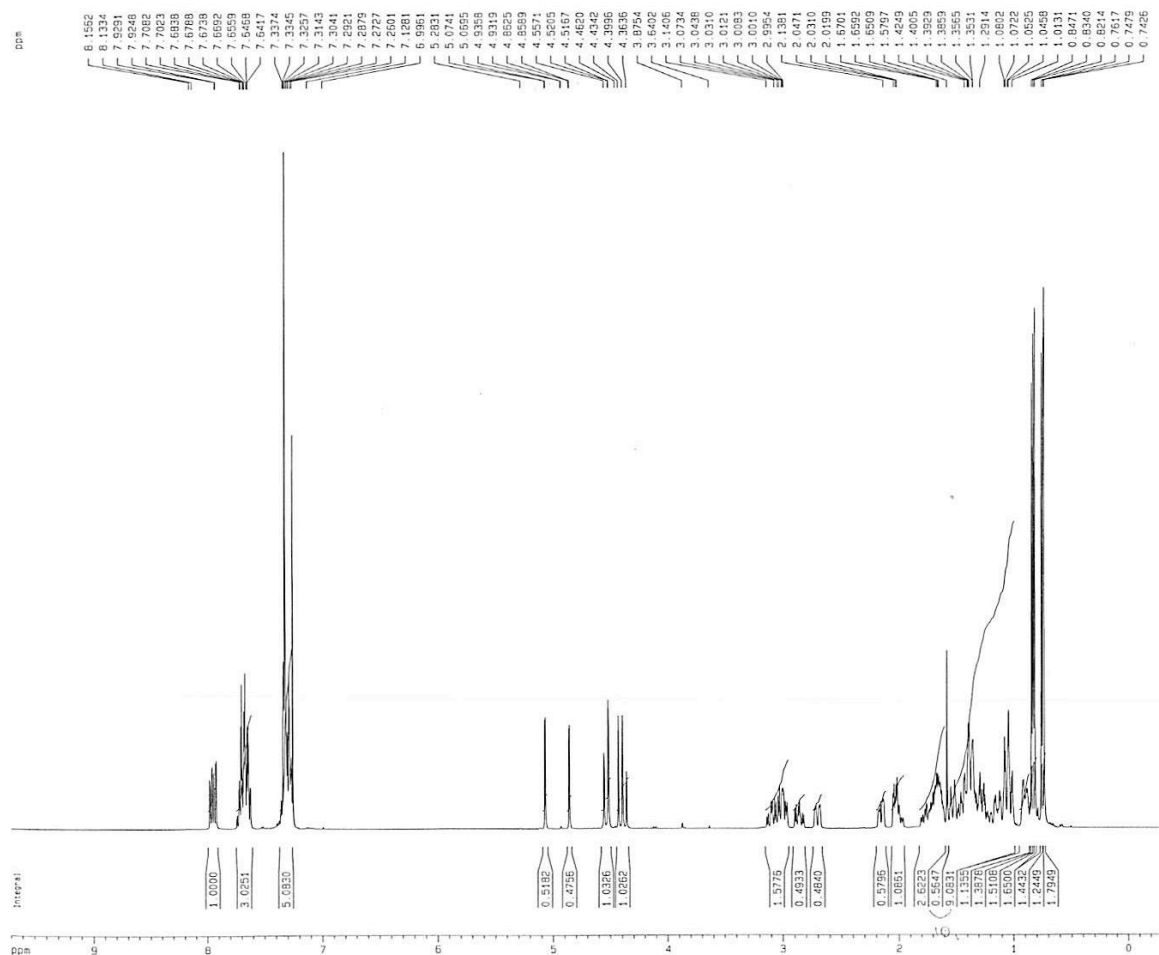

DPX400 carbon

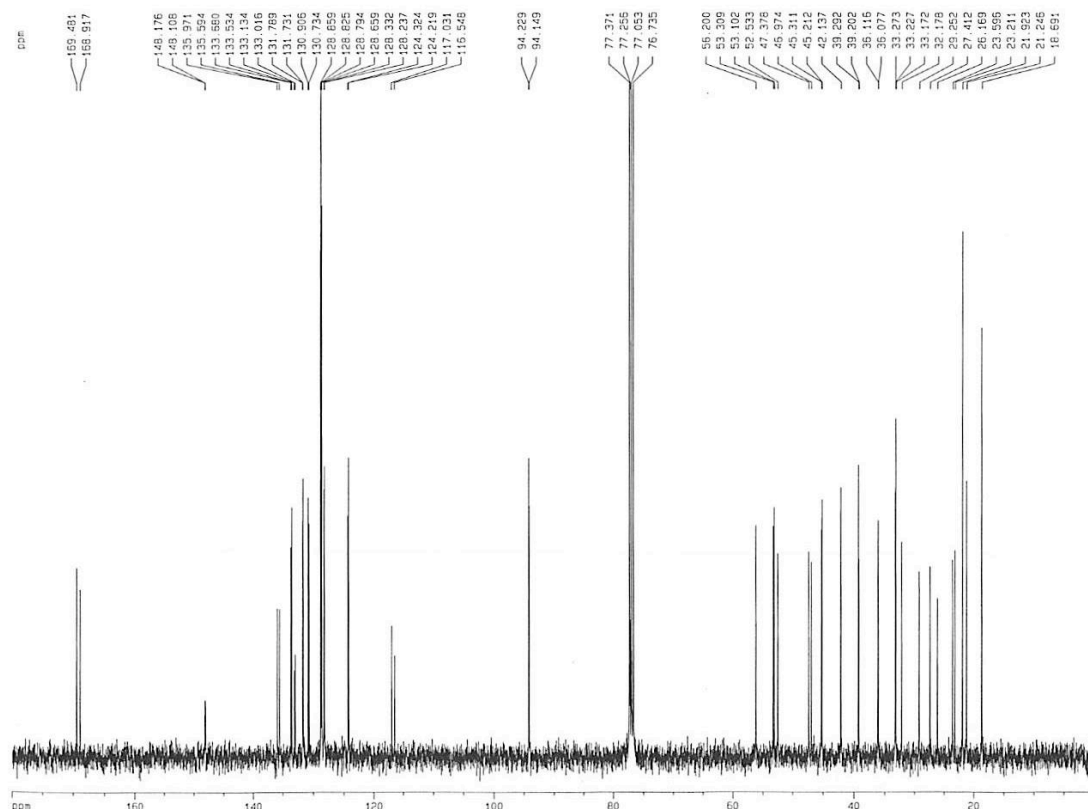

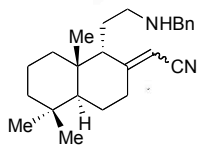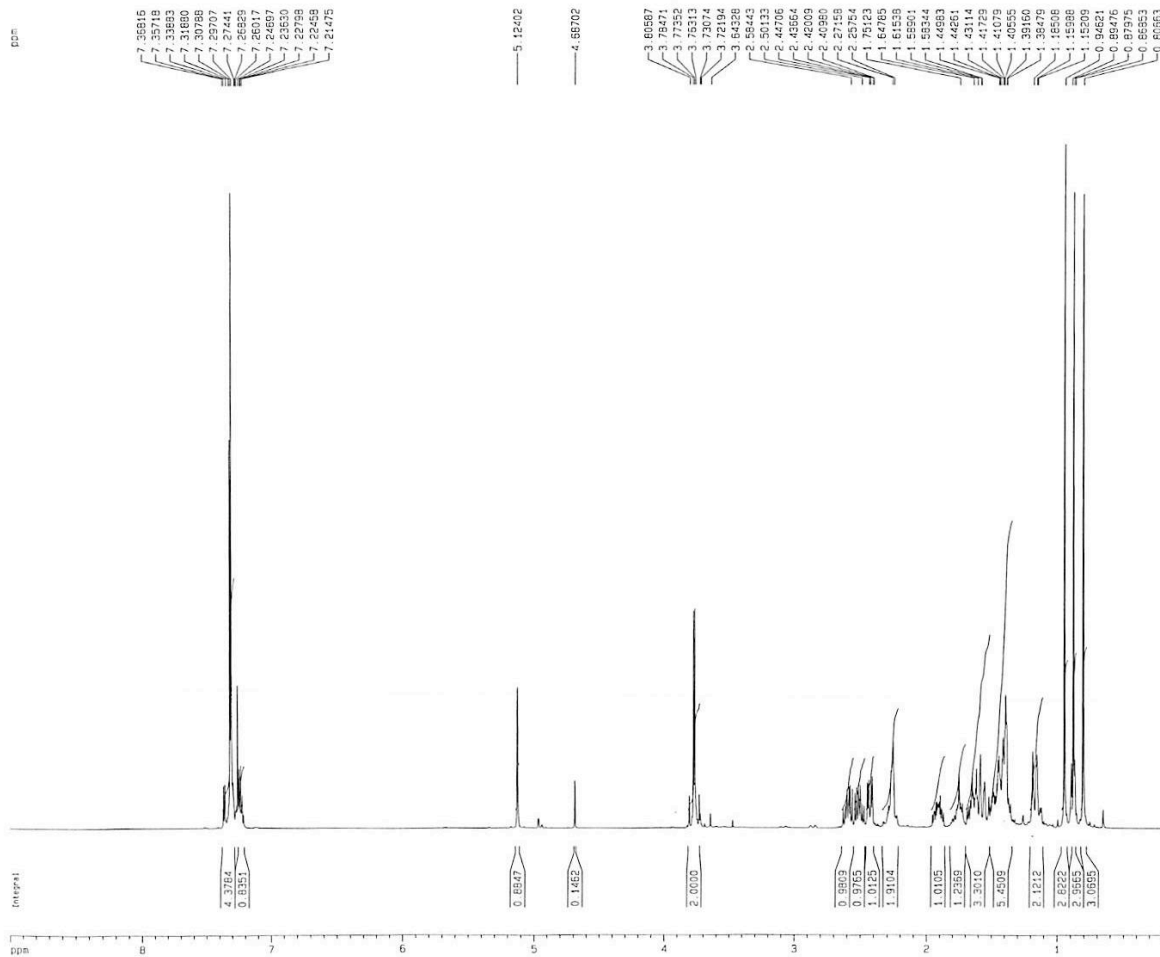

Current Data Parameters  
NAME suzuki1  
EXPNO 62  
PROCNO 1

F2 - Acquisition Parameters  
Date\_ 20091219  
Time 18.09  
INSTRUM spect  
PROBHD 5 mm QNP 1H/13  
PULPROG zg30  
TD 65536  
SOLVENT CDCl3  
NS 32  
DS 2  
SWH 8276.146 Hz  
FIDRES 0.126314 Hz  
AQ 3.9584243 sec  
RG 181  
DW 60.400 usec  
DE 6.00 usec  
TE 300.2 K  
D1 1.00000000 sec  
MCREST 0.00000000 sec  
MCWRK 0.01500000 sec

\*\*\*\*\* CHANNEL f1 \*\*\*\*\*  
NUC1 1H  
P1 11.50 usec  
PL1 -4.00 dB  
SFO1 400.0324703 MHz

F2 - Processing parameters  
SI 32768  
SF 400.0300065 MHz  
WDW EM  
SSB 0  
LB 0.30 Hz  
GB 0  
PC 1.00

1D NMR plot parameters  
CX 32.00 cm  
CY 19.00 cm  
F1 9.000 ppm  
F2 3600.27 Hz  
F2P 0.200 ppm  
F2 80.01 Hz  
PPMCH 0.27500 ppm/cm  
HZCM 110.00825 Hz/cm

DPX400 carbon

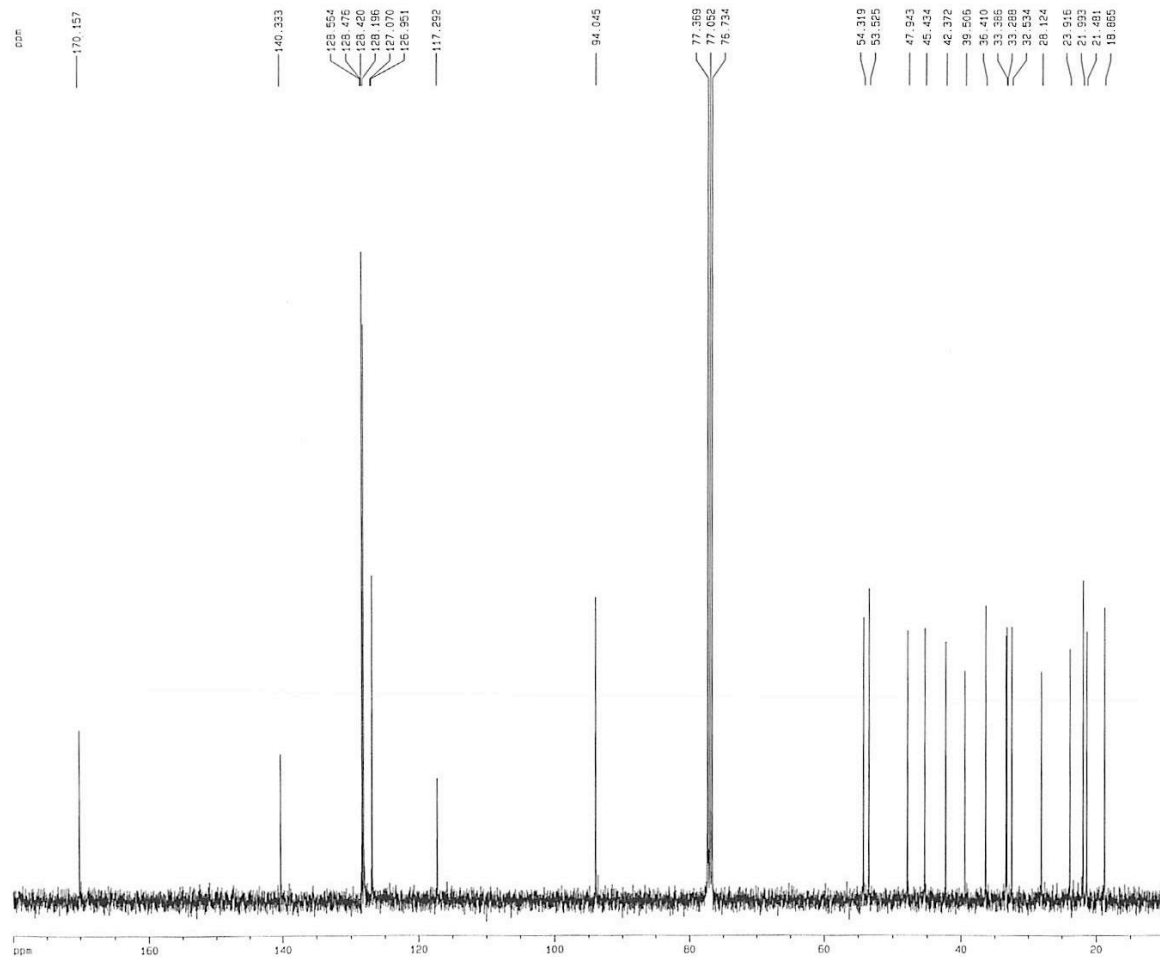

Current Data Parameters  
NAME suzuki1  
EXPNO 63  
PROCNO 1

F2 - Acquisition Parameters  
Date\_ 20091219  
Time 18.22  
INSTRUM spect  
PROBHD 5 mm QNP 1H/13  
PULPROG zgpg30  
TD 65536  
SOLVENT CDCl3  
NS 265  
DS 4  
SWH 26178.010 Hz  
FIDRES 0.399445 Hz  
AQ 1.2517875 sec  
RG 8192  
DW 19.100 usec  
DE 6.00 usec  
TE 300.2 K  
D1 2.00000000 sec  
d11 0.03000000 sec  
DELTA 1.89999999 sec  
MCREST 0.00000000 sec  
MCWRK 0.01500000 sec

\*\*\*\*\* CHANNEL f1 \*\*\*\*\*  
NUC1 13C  
P1 10.00 usec  
PL1 -3.50 dB  
SFO1 100.5960886 MHz

\*\*\*\*\* CHANNEL f2 \*\*\*\*\*  
CPDPRG2 waltz16  
NUC2 1H  
PCPD2 100.00 usec  
PL2 -4.00 dB  
PL12 17.00 dB  
PL13 17.00 dB  
SFO2 400.0316001 MHz

F2 - Processing parameters  
SI 32768  
SF 100.5876214 MHz  
WDW EM  
SSB 0  
LB 1.00 Hz  
GB 0  
PC 1.40

1D NMR plot parameters  
CX 32.00 cm  
CY 18.00 cm  
F1P 180.000 ppm  
F1 18105.77 Hz  
F2P 10.000 ppm  
F2 1005.88 Hz  
PPMCH 5.31250 ppm/cm  
HZCM 534.37177 Hz/cm

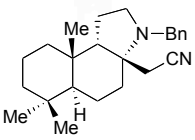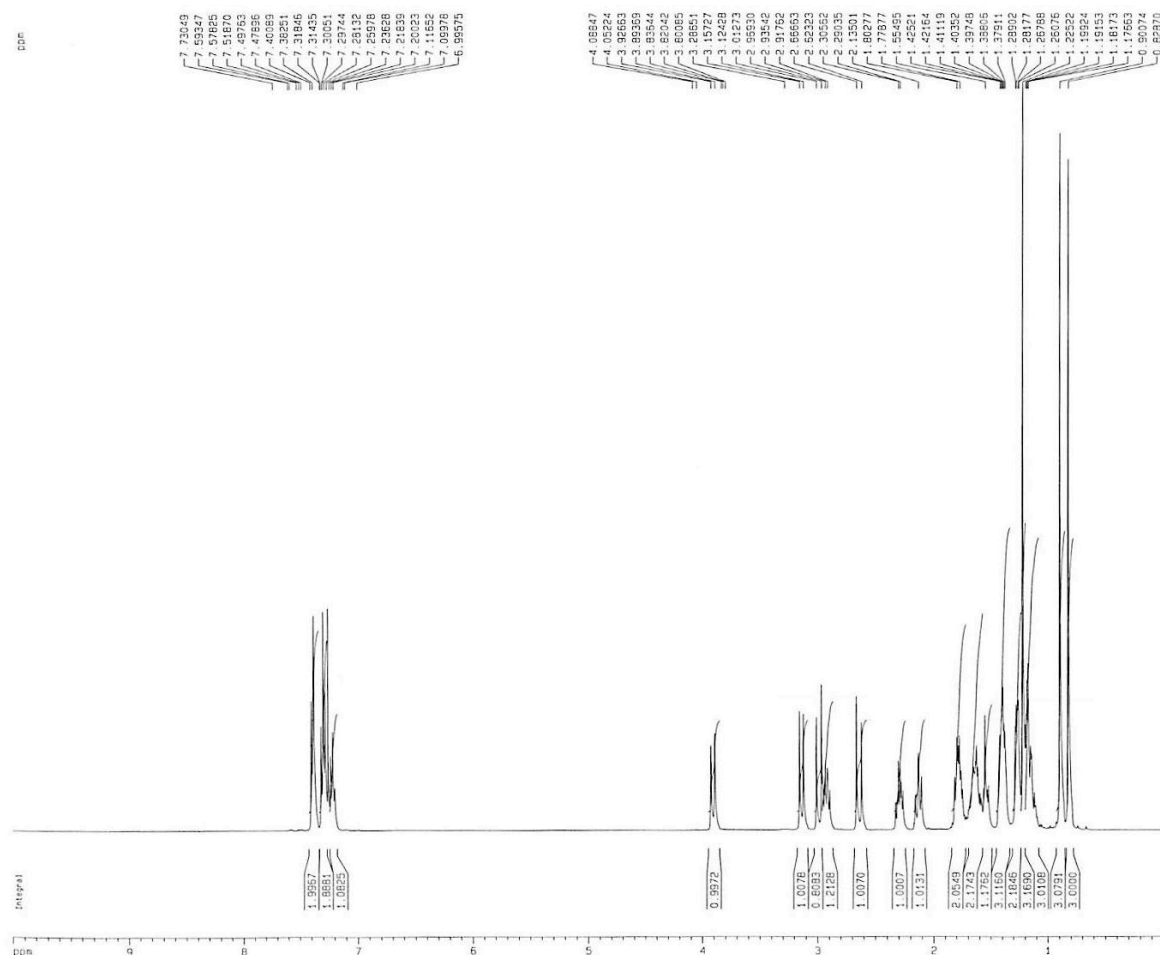

Current Data Parameters  
NAME: Suzuki  
EXPNO: 16  
PROCNO: 1

F2 - Acquisition Parameters  
Date\_: 20081205  
Time: 22.13  
INSTRUM: spect  
PROBHD: 5 mm QNP 1H/13  
PULPROG: zgpg30  
TD: 65536  
SOLVENT: CDCl3  
NS: 16  
DS: 2  
SWH: 8278.146 Hz  
FIDRES: 0.126314 Hz  
AQ: 3.9584243 sec  
RG: 161.3  
DW: 60.400 usec  
DE: 6.00 usec  
TE: 300.2 K  
D1: 1.00000000 sec  
MCREST: 0.00000000 sec  
MCWRK: 0.01500000 sec

\*\*\*\*\* CHANNEL f1 \*\*\*\*\*  
NUC1: 1H  
P1: 11.50 usec  
PL1: -4.00 dB  
SFO1: 400.0324703 MHz

F2 - Processing parameters  
SI: 32768  
SF: 400.0300070 MHz  
WDW: EM  
SSB: 0  
LB: 0.30 Hz  
GB: 0  
PC: 1.00

1D NMR plot parameters  
CX: 32.00 cm  
CY: 21.00 cm  
F1P: 10.000 ppm  
F1: 4000.30 Hz  
F2P: 0.000 ppm  
F2: 0.00 Hz  
PRMCM: 0.31250 ppm/cm  
HZCM: 125.00938 Hz/cm

DPX400 carbon

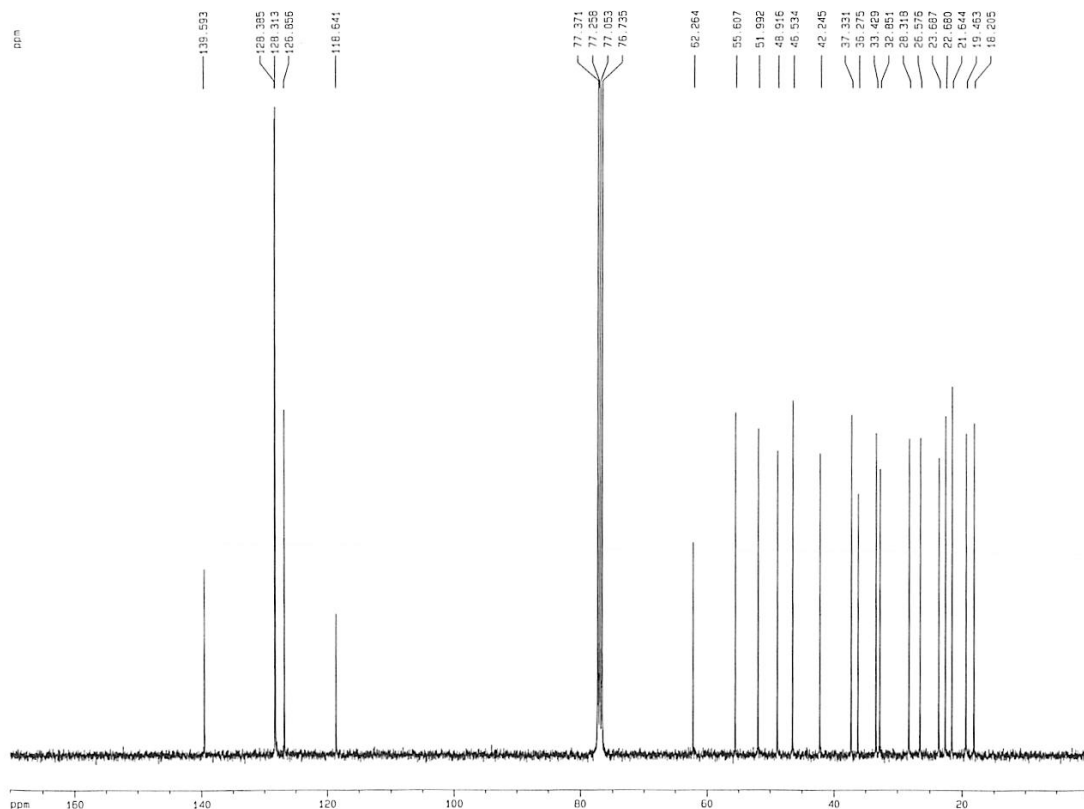

Current Data Parameters  
NAME: Suzuki  
EXPNO: 17  
PROCNO: 1

F2 - Acquisition Parameters  
Date\_: 20081205  
Time: 22.34  
INSTRUM: spect  
PROBHD: 5 mm QNP 1H/13  
PULPROG: zgpg30  
TD: 65536  
SOLVENT: CDCl3  
NS: 2366  
DS: 4  
SWH: 26178.010 Hz  
FIDRES: 0.399445 Hz  
AQ: 1.2517875 sec  
RG: 8192  
DW: 19.100 usec  
DE: 6.00 usec  
TE: 300.2 K  
D1: 2.00000000 sec  
d11: 0.03000000 sec  
DELTA: 1.89999998 sec  
MCREST: 0.00000000 sec  
MCWRK: 0.01500000 sec

\*\*\*\*\* CHANNEL f1 \*\*\*\*\*  
NUC1: 13C  
P1: 10.00 usec  
PL1: -3.50 dB  
SFO1: 100.5986886 MHz

\*\*\*\*\* CHANNEL f2 \*\*\*\*\*  
CPDPRG2: waltz16  
NUC2: 1H  
PCPD2: 100.00 usec  
PL2: -4.00 dB  
PL12: 17.00 dB  
PL13: 17.00 dB  
SFO2: 400.0316001 MHz

F2 - Processing parameters  
SI: 32768  
SF: 100.5876206 MHz  
WDW: EM  
SSB: 0  
LB: 1.00 Hz  
GB: 0  
PC: 1.40

1D NMR plot parameters  
CX: 32.00 cm  
CY: 19.00 cm  
F1P: 170.000 ppm  
F1: 17099.90 Hz  
F2P: 0.000 ppm  
F2: 0.00 Hz  
PRMCM: 5.66667 ppm/cm  
HZCM: 569.99652 Hz/cm



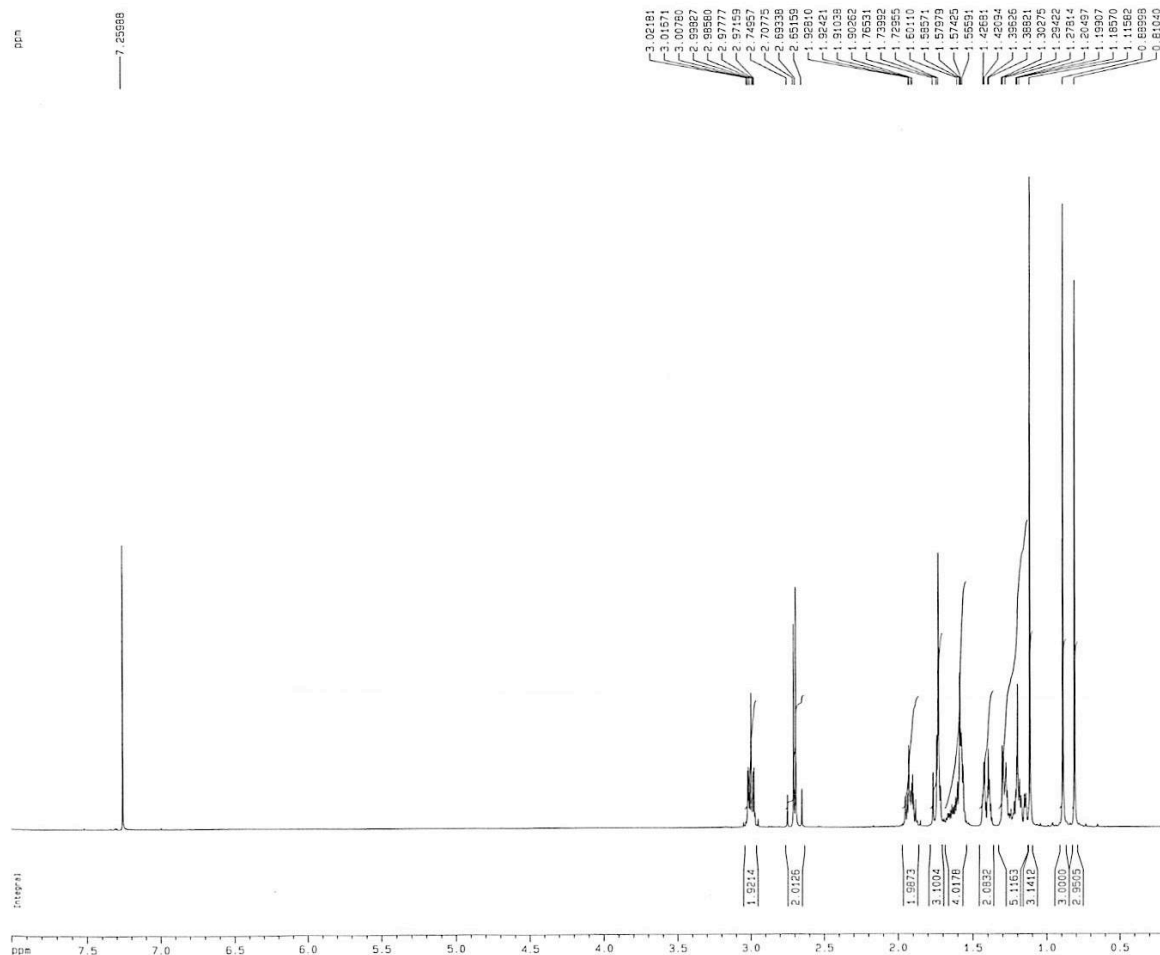

DPX400 carbon

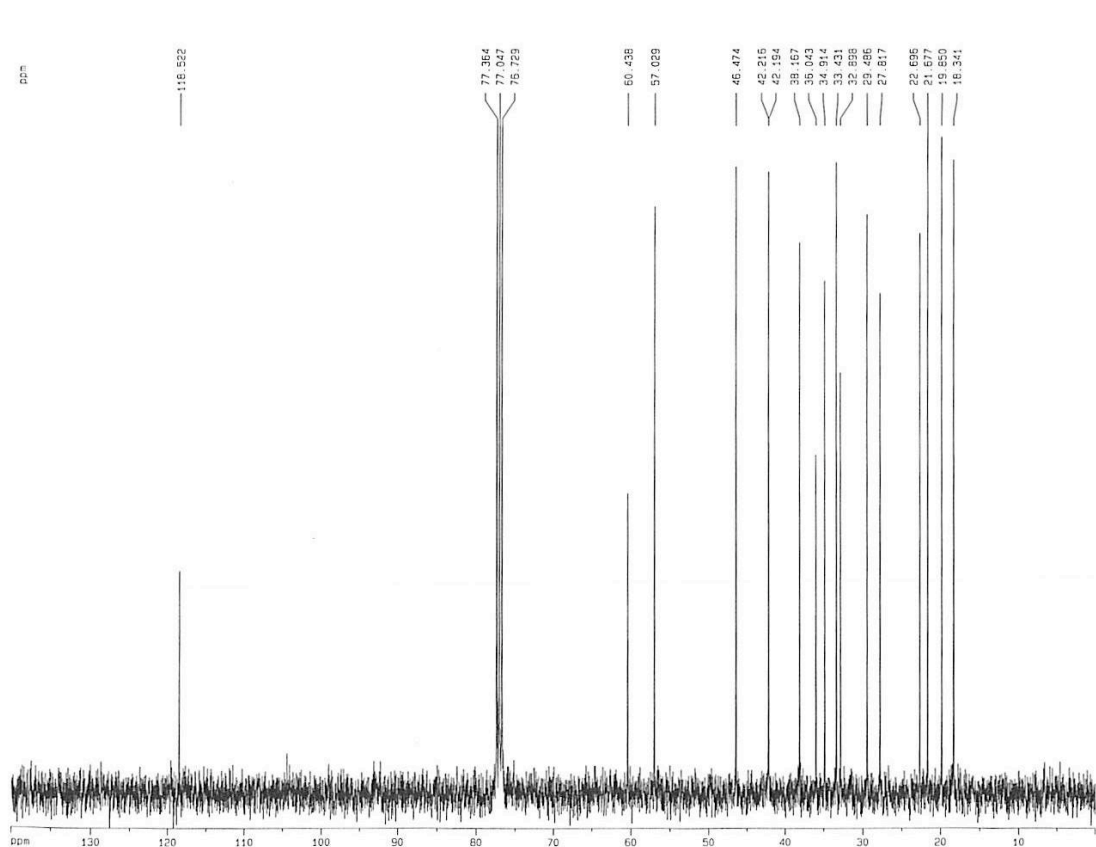

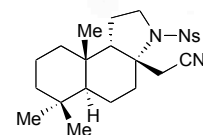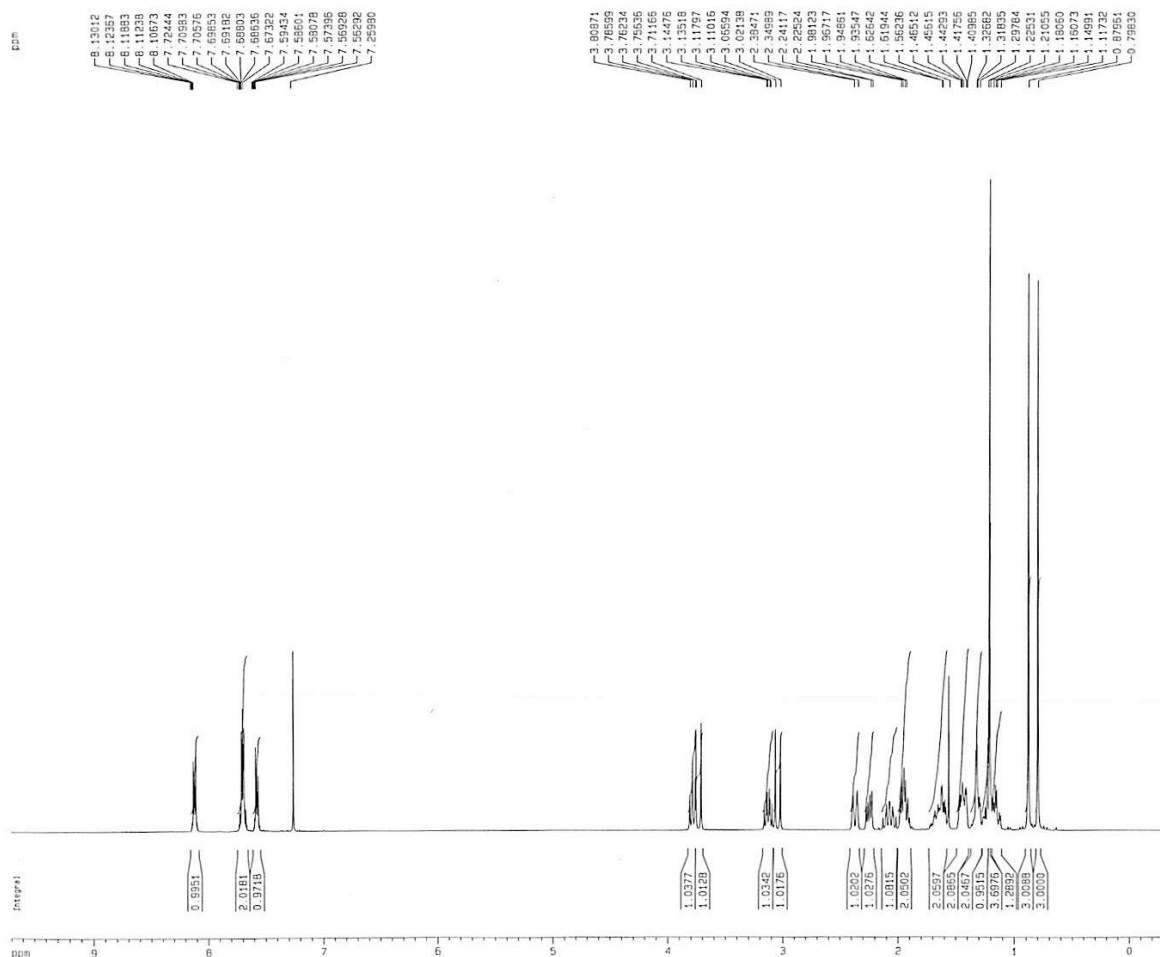

Current Data Parameters  
NAME suzuk1  
EXPNO 36  
PROCNO 1

F2 - Acquisition Parameters  
Date\_ 20091203  
Time 17.53  
INSTRUM spect  
PROBHD 5 mm QNP 1H/13  
PULPROG zg30  
TD 65536  
SOLVENT CDCl3  
NS 32  
DS 2  
SWH 8278.146 Hz  
FIDRES 0.126314 Hz  
AQ 3.9584243 sec  
RG 228.1  
DW 60.400 usec  
DE 6.00 usec  
TE 300.2 K  
D1 1.00000000 sec  
MCREST 0.00000000 sec  
MCWRK 0.01500000 sec

===== CHANNEL f1 =====  
NUC1 1H  
P1 11.50 usec  
PL1 -4.00 dB  
SFO1 400.0324703 MHz

F2 - Processing parameters  
SI 32768  
SF 400.0300067 MHz  
WDW EM  
SSB 0  
LB 0.30 Hz  
GB 0  
PC 1.00

1D NMR plot parameters  
CX 32.00 cm  
CY 18.00 cm  
F1P 9.700 ppm  
F1 3880.29 Hz  
F2P -0.360 ppm  
F2 -120.01 Hz  
PPMCH 0.31250 ppm/cm  
HZCM 125.00938 Hz/cm

DPX400 carbon

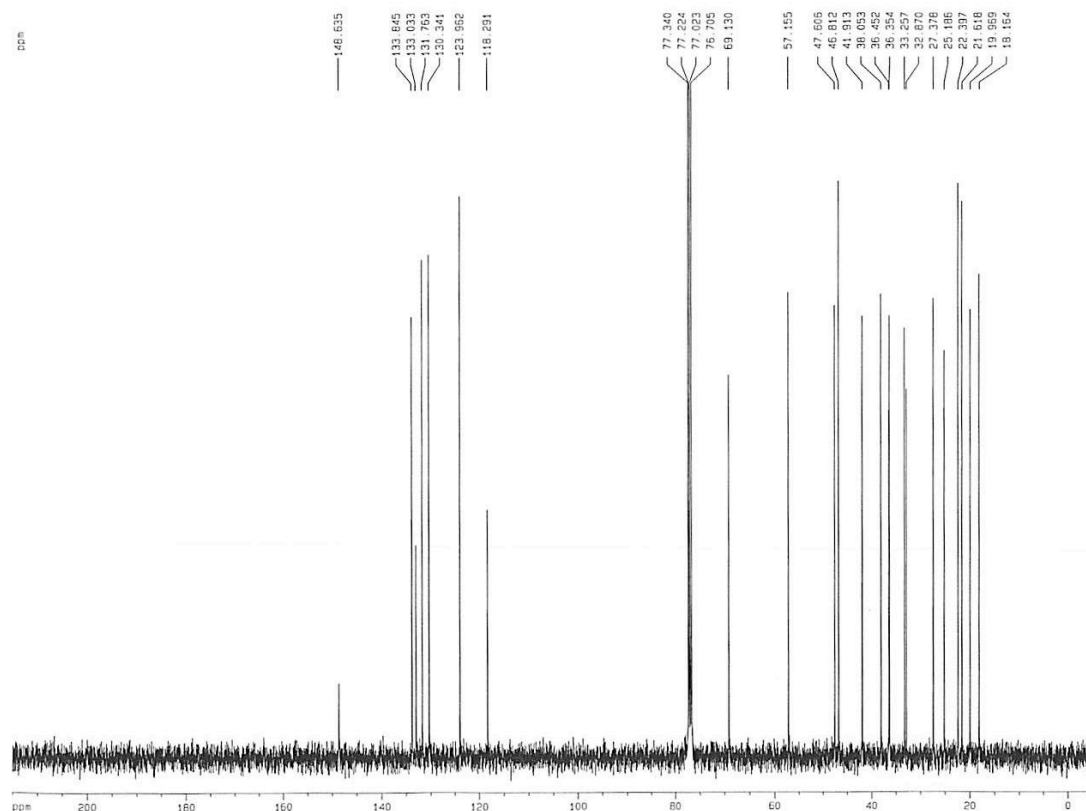

Current Data Parameters  
NAME suzuk1  
EXPNO 37  
PROCNO 1

F2 - Acquisition Parameters  
Date\_ 20091203  
Time 18.13  
INSTRUM spect  
PROBHD 5 mm QNP 1H/13  
PULPROG zgpg30  
TD 65536  
SOLVENT CDCl3  
NS 620  
DS 4  
SWH 26178.010 Hz  
FIDRES 0.399445 Hz  
AQ 1.2517875 sec  
RG 7298.2  
DW 18.100 usec  
DE 6.00 usec  
TE 300.2 K  
D1 2.00000000 sec  
d11 0.03000000 sec  
DELTA 1.89999998 sec  
MCREST 0.00000000 sec  
MCWRK 0.01500000 sec

===== CHANNEL f1 =====  
NUC1 13C  
P1 10.00 usec  
PL1 -3.50 dB  
SFO1 100.5986886 MHz

===== CHANNEL f2 =====  
CPDPRG2 waltz16  
NUC2 1H  
PCPD2 100.00 usec  
PL2 -4.00 dB  
PL12 17.00 dB  
PL13 17.00 dB  
SFO2 400.0316001 MHz

F2 - Processing parameters  
SI 32768  
SF 100.5876240 MHz  
WDW EM  
SSB 0  
LB 1.00 Hz  
GB 0  
PC 1.40

1D NMR plot parameters  
CX 30.00 cm  
CY 16.00 cm  
F1P 215.000 ppm  
F1 21626.34 Hz  
F2P -5.000 ppm  
F2 -502.94 Hz  
PPMCH 7.33333 ppm/cm  
HZCM 737.64258 Hz/cm

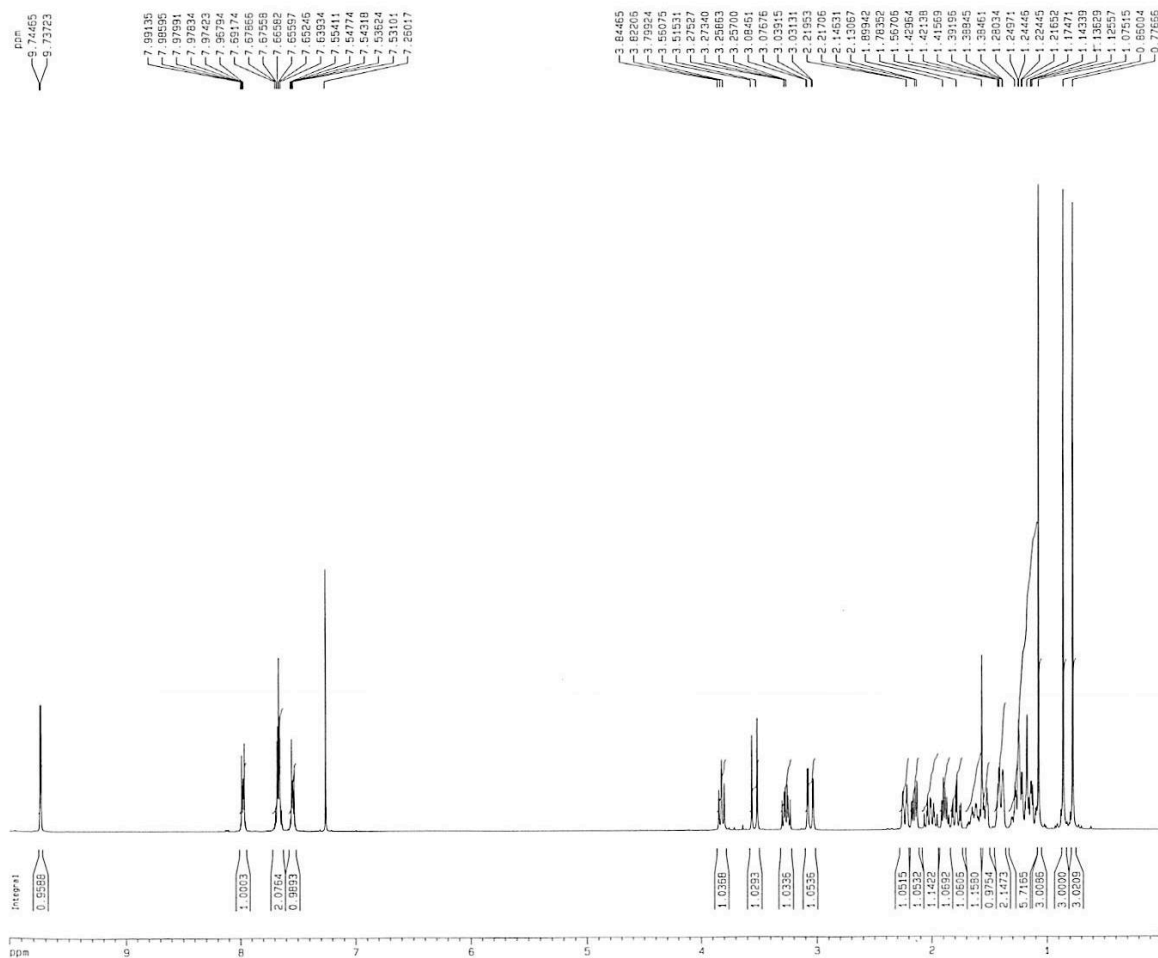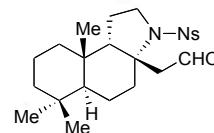

Current Data Parameters  
NAME suzuk1  
EXPNO 40  
PROCNO 1

F2 - Acquisition Parameters  
Date\_ 20091204  
Time 19.57  
INSTRUM spect  
PROBHD 5 mm QNP 1H/13  
PULPROG zg30  
TD 65536  
SOLVENT CDCl3  
NS 32  
DS 2  
SWH 8278.146 Hz  
FIDRES 0.126314 Hz  
AQ 3.9584243 sec  
RG 256  
DW 60.400 usec  
DE 6.00 usec  
TE 300.2 K  
D1 1.00000000 sec  
MCREST 0.00000000 sec  
MCWRR 0.01500000 sec

===== CHANNEL f1 =====  
NUC1 1H  
P1 11.50 usec  
PL1 -4.00 dB  
SFO1 400.0324703 MHz

F2 - Processing parameters  
SI 32768  
SF 400.0300065 MHz  
WDW EM  
SSB 0  
LB 0.30 Hz  
GB 0  
PC 1.00

1D NMR plot parameters  
CX 32.00 cm  
CY 18.00 cm  
F1P 10.000 ppm  
F1 4000.30 Hz  
F2P 0.000 ppm  
F2 0.00 Hz  
PRMCM 0.31250 ppm/cm  
HZCM 125.00938 Hz/cm

DPX400 carbon

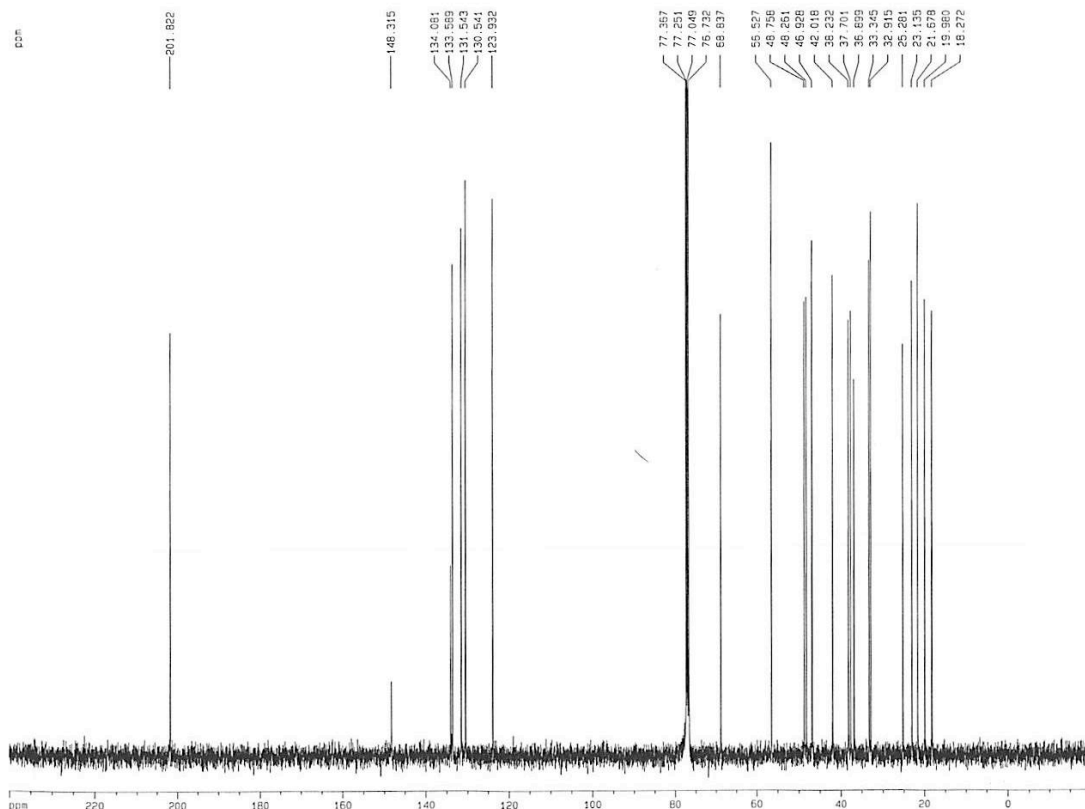

Current Data Parameters  
NAME suzuk1  
EXPNO 41  
PROCNO 1

F2 - Acquisition Parameters  
Date\_ 20091204  
Time 20.10  
INSTRUM spect  
PROBHD 5 mm QNP 1H/13  
PULPROG zgpg30  
TD 65536  
SOLVENT CDCl3  
NS 1683  
DS 4  
SWH 26178.010 Hz  
FIDRES 0.399445 Hz  
AQ 1.2517875 sec  
RG 16384  
DW 19.100 usec  
DE 6.00 usec  
TE 300.2 K  
D1 2.00000000 sec  
d11 0.03000000 sec  
DELTA 1.89999998 sec  
MCREST 0.00000000 sec  
MCWRR 0.01500000 sec

===== CHANNEL f1 =====  
NUC1 13C  
P1 10.00 usec  
PL1 -3.50 dB  
SFO1 100.5966866 MHz

===== CHANNEL f2 =====  
CPDPRG2 waltz16  
NUC2 1H  
PCPD2 100.00 usec  
PL2 -4.00 dB  
PL12 17.00 dB  
PL13 17.00 dB  
SFO2 400.0316001 MHz

F2 - Processing parameters  
SI 32768  
SF 100.5876206 MHz  
WDW EM  
SSB 0  
LB 1.00 Hz  
GB 0  
PC 1.40

1D NMR plot parameters  
CX 30.00 cm  
CY 17.00 cm  
F1P 240.159 ppm  
F1 24157.07 Hz  
F2P -20.091 ppm  
F2 -2020.94 Hz  
PRMCM 8.67563 ppm/cm  
HZCM 872.60028 Hz/cm

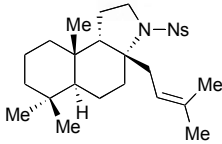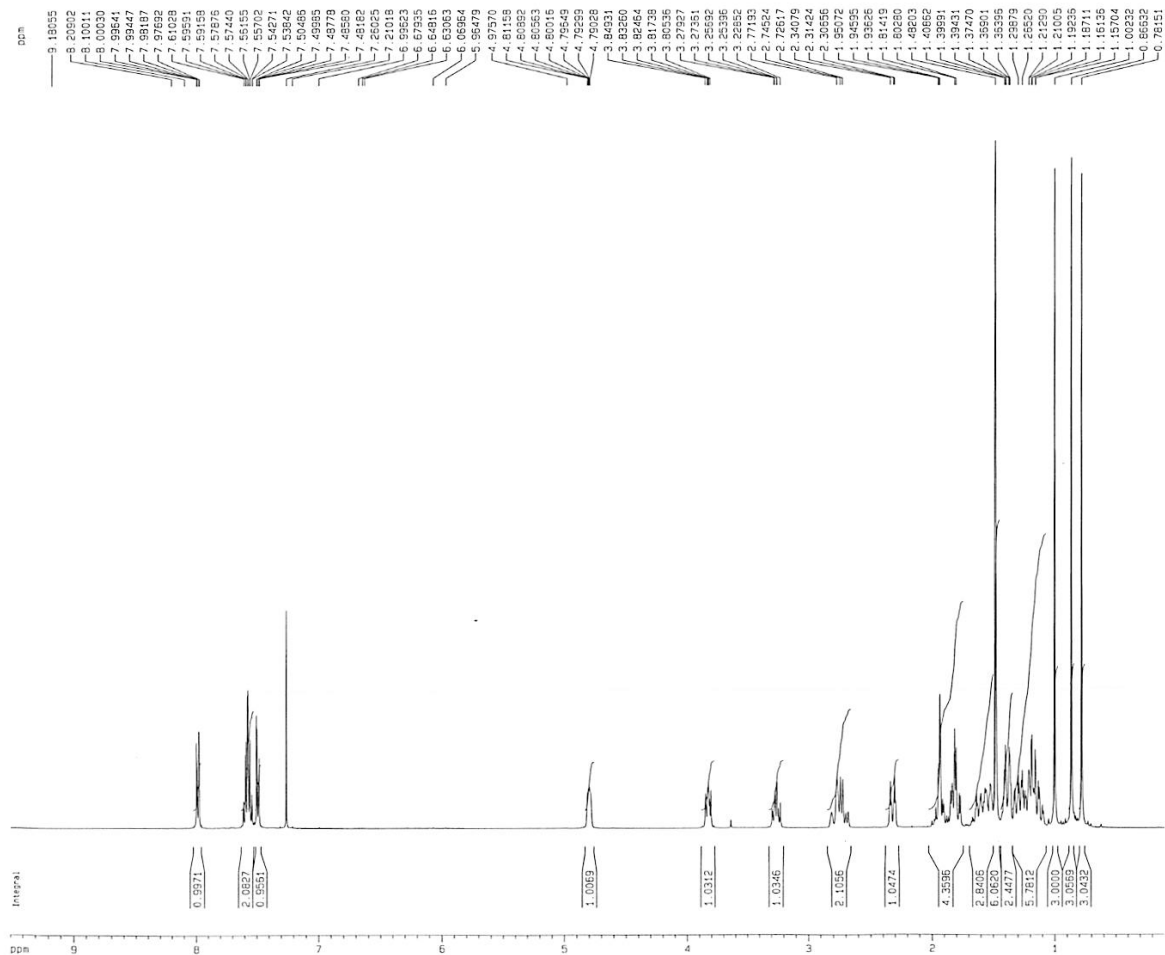

Current Data Parameters  
NAME suzuk1  
EXPNO 48  
PROCNO 1

F2 - Acquisition Parameters  
Date\_ 20091209  
Time 19.52  
INSTRUM spect  
PROBHD 5 mm QNP 1H/13  
PULPROG zgpg30  
TD 65536  
SOLVENT CDCl3  
NS 32  
DS 2  
SWH 8278.146 Hz  
FIDRES 0.126314 Hz  
AQ 3.9584243 sec  
RG 161.3  
DW 60.400 usec  
DE 6.00 usec  
TE 300.2 K  
D1 1.00000000 sec  
MCREST 0.00000000 sec  
MCWRR 0.01500000 sec

===== CHANNEL f1 =====  
NUC1 1H  
P1 11.50 usec  
PL1 -4.00 dB  
SFO1 400.0324703 MHz

F2 - Processing parameters  
SI 32768  
SF 400.0300065 MHz  
WDW EM  
SSB 0  
LB 0.30 Hz  
GB 0  
PC 1.00

1D NMR plot parameters  
CX 32.00 cm  
CY 19.00 cm  
F1P 9.500 ppm  
F1 3800.26 Hz  
F2P 0.100 ppm  
F2 40.00 Hz  
PRMCM 0.29375 ppm/cm  
HZCM 117.50881 Hz/cm

DPX400 carbon

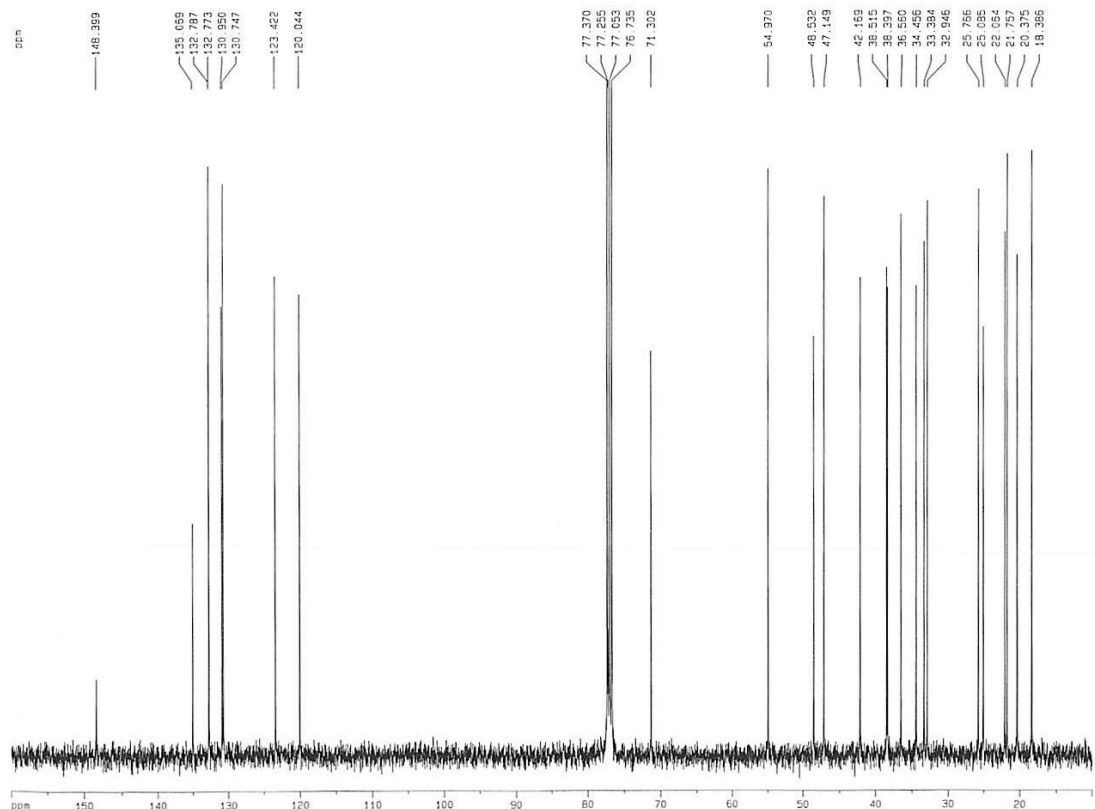

Current Data Parameters  
NAME suzuk1  
EXPNO 49  
PROCNO 1

F2 - Acquisition Parameters  
Date\_ 20091209  
Time 20.01  
INSTRUM spect  
PROBHD 5 mm QNP 1H/13  
PULPROG zgpg30  
TD 65536  
SOLVENT CDCl3  
NS 770  
DS 4  
SWH 26178.010 Hz  
FIDRES 0.399445 Hz  
AQ 1.2517875 sec  
RG 8192  
DW 19.100 usec  
DE 6.00 usec  
TE 300.2 K  
D1 2.00000000 sec  
d11 0.03000000 sec  
DELTA 1.89999998 sec  
MCREST 0.00000000 sec  
MCWRR 0.01500000 sec

===== CHANNEL f1 =====  
NUC1 13C  
P1 10.00 usec  
PL1 -3.50 dB  
SFO1 100.5986886 MHz

===== CHANNEL f2 =====  
CPDPRG2 waltz16  
NUC2 1H  
PCPD2 100.00 usec  
PL2 -4.00 dB  
PL12 17.00 dB  
PL13 17.00 dB  
SFO2 400.0316001 MHz

F2 - Processing parameters  
SI 32768  
SF 100.5876206 MHz  
WDW EM  
SSB 0  
LB 1.00 Hz  
GB 0  
PC 1.40

1D NMR plot parameters  
CX 30.00 cm  
CY 17.00 cm  
F1P 160.000 ppm  
F1 16094.02 Hz  
F2P 10.000 ppm  
F2 100.58 Hz  
PRMCM 5.00000 ppm/cm  
HZCM 502.93811 Hz/cm



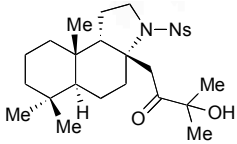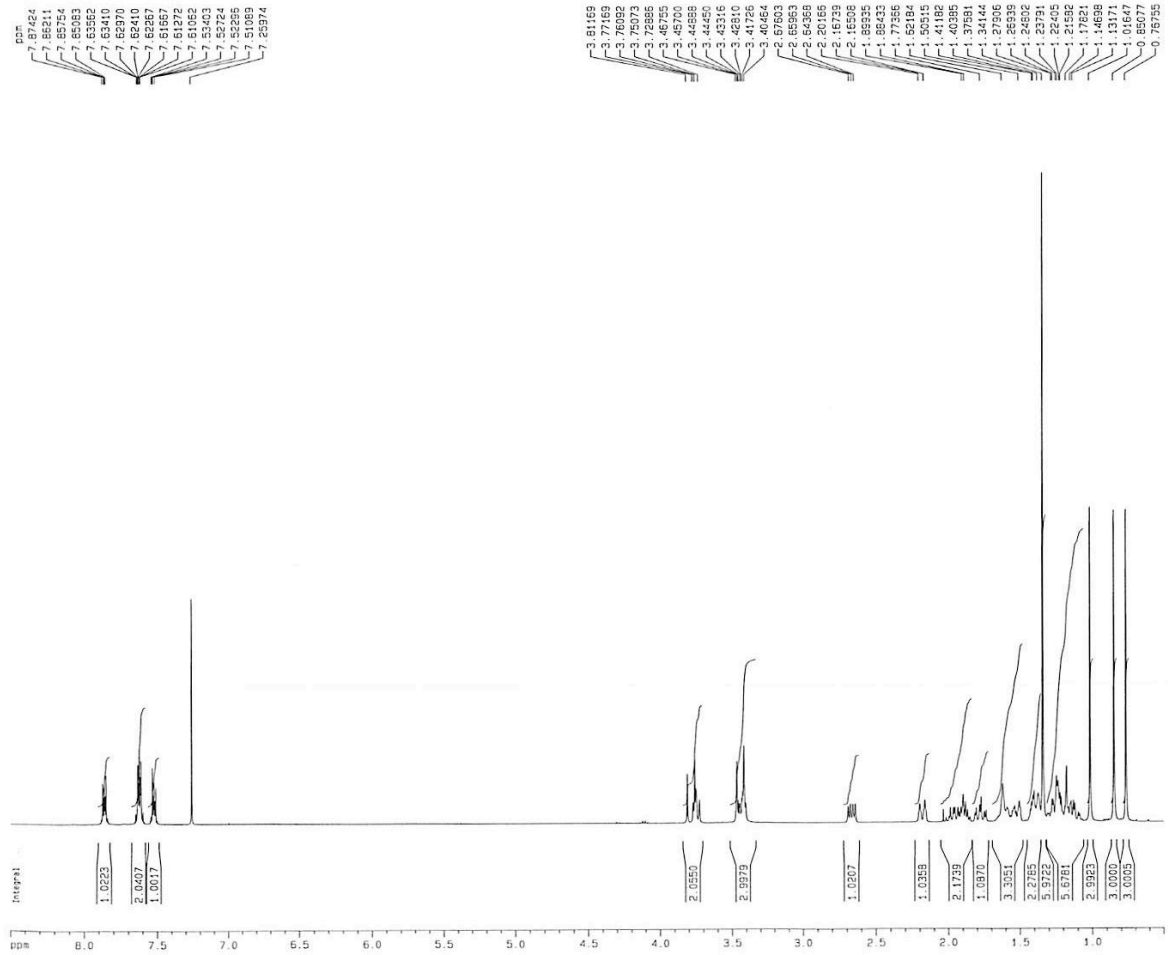

Current Data Parameters  
NAME suzuk1  
EXPNO 101  
PROCNO 1

F2 - Acquisition Parameters  
Date\_ 20100827  
Time 19.41  
INSTRUM spect  
PROBHD 5 mm QNP 1H/13  
PULPROG zgpg30  
TD 65536  
SOLVENT CDCl3  
NS 382  
DS 4  
SWH 26178.010 Hz  
FIDRES 0.399445 Hz  
AQ 1.2517875 sec  
RG 5792.6  
OW 19.100 usec  
DE 6.00 usec  
TE 300.2 K  
D1 2.00000000 sec  
d11 0.03000000 sec  
DELTA 1.89999998 sec  
MCREST 0.00000000 sec  
MCWRR 0.01500000 sec

\*\*\*\*\* CHANNEL f1 \*\*\*\*\*  
NUC1 1H  
P1 11.50 usec  
PL1 -4.00 dB  
SFO1 400.0324703 MHz

F2 - Processing parameters  
SI 32768  
SF 400.0300057 MHz  
WDW EM  
SSB 0  
LB 0.30 Hz  
GB 0  
PC 1.00

1D NMR plot parameters  
CX 32.00 cm  
CY 18.00 cm  
F1P 8.500 ppm  
F1 3400.25 Hz  
F2P 0.500 ppm  
F2 200.01 Hz  
PPMCM 0.25000 ppm/cm  
HZCM 100.00750 Hz/cm

DPX400 carbon

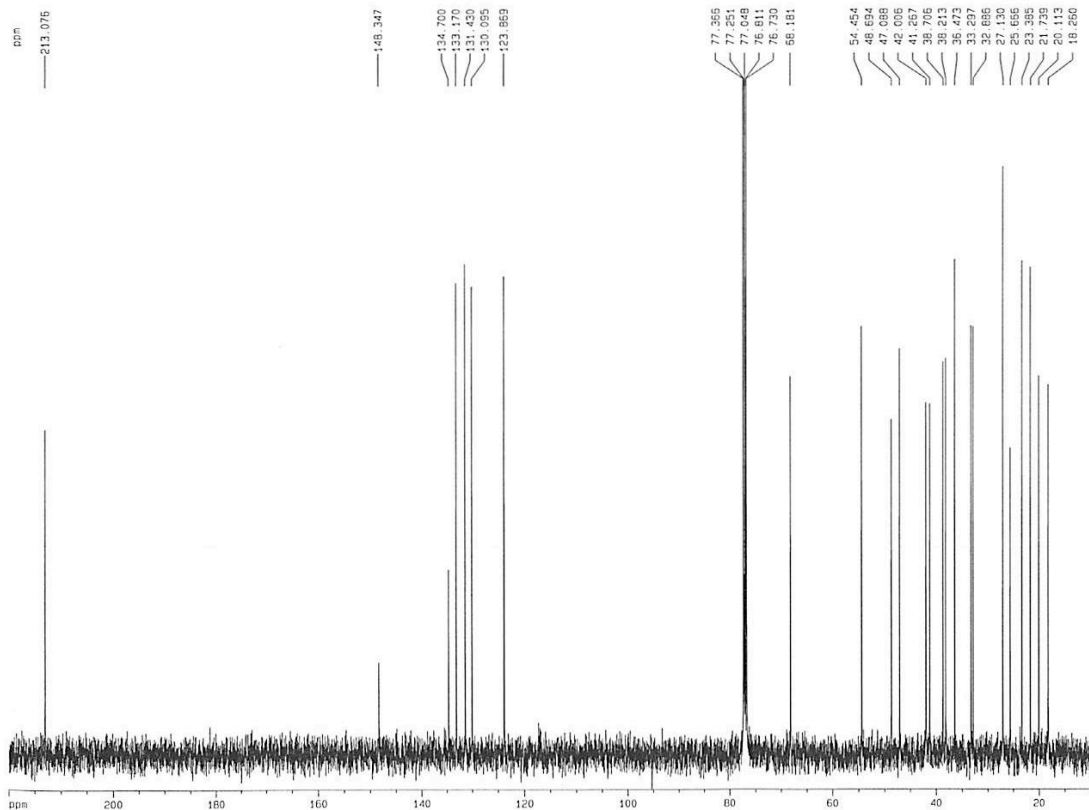

Current Data Parameters  
NAME suzuk1  
EXPNO 102  
PROCNO 1

F2 - Acquisition Parameters  
Date\_ 20100827  
Time 19.56  
INSTRUM spect  
PROBHD 5 mm QNP 1H/13  
PULPROG zgpg30  
TD 65536  
SOLVENT CDCl3  
NS 382  
DS 4  
SWH 26178.010 Hz  
FIDRES 0.399445 Hz  
AQ 1.2517875 sec  
RG 5792.6  
OW 19.100 usec  
DE 6.00 usec  
TE 300.2 K  
D1 2.00000000 sec  
d11 0.03000000 sec  
DELTA 1.89999998 sec  
MCREST 0.00000000 sec  
MCWRR 0.01500000 sec

\*\*\*\*\* CHANNEL f1 \*\*\*\*\*  
NUC1 13C  
P1 10.00 usec  
PL1 -3.50 dB  
SFO1 100.5986886 MHz

\*\*\*\*\* CHANNEL f2 \*\*\*\*\*  
CPDPRG2 waltz16  
NUC2 1H  
PCPD2 100.00 usec  
PL2 -4.00 dB  
PL12 17.00 dB  
PL13 17.00 dB  
SFO2 400.0316001 MHz

F2 - Processing parameters  
SI 32768  
SF 100.5876214 MHz  
WDW EM  
SSB 0  
LB 1.00 Hz  
GB 0  
PC 1.40

1D NMR plot parameters  
CX 30.00 cm  
CY 17.00 cm  
F1P 220.000 ppm  
F1 22129.28 Hz  
F2P 10.000 ppm  
F2 1005.88 Hz  
PPMCM 7.00000 ppm/cm  
HZCM 704.11334 Hz/cm

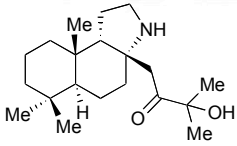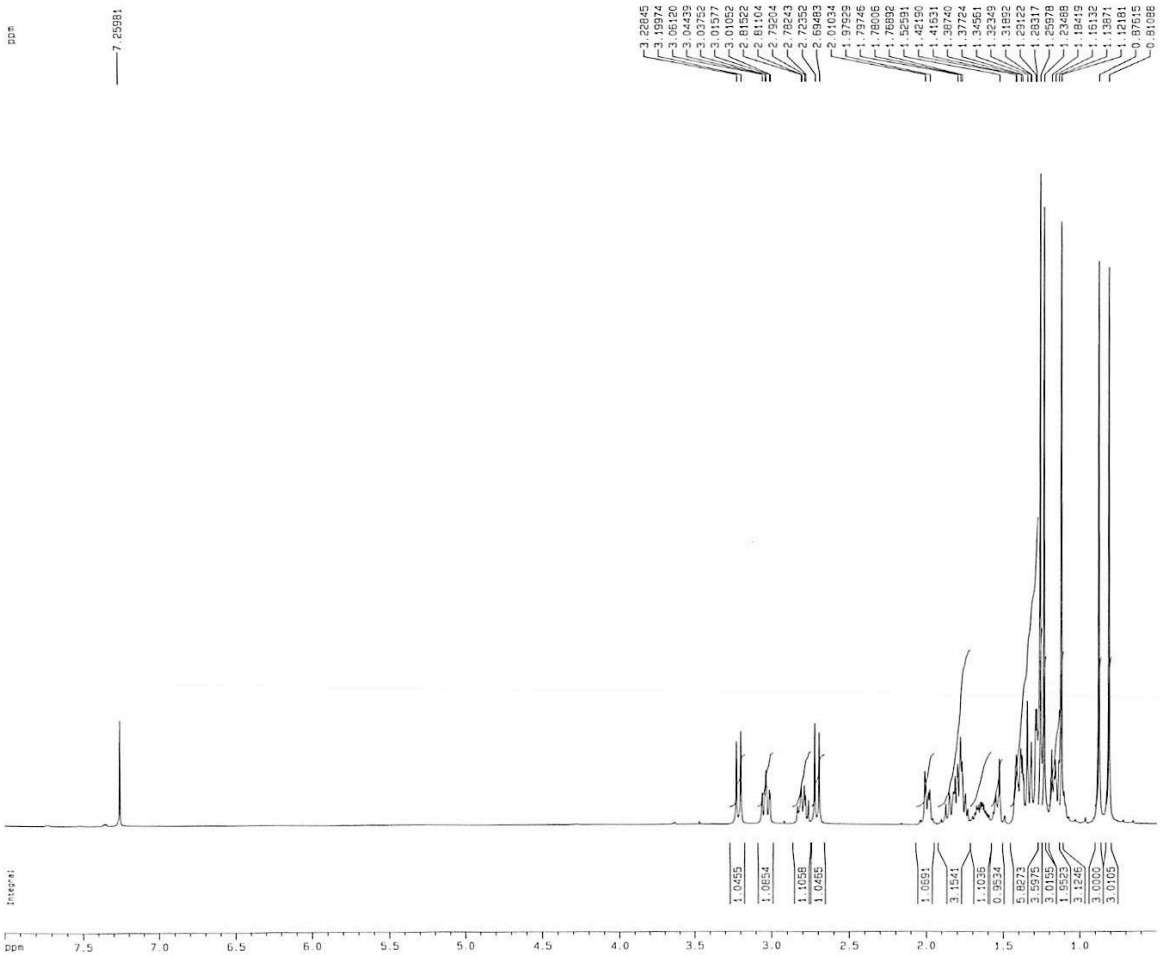

Current Data Parameters  
NAME suzuki  
EXPNO 105  
PROCNO 1

F2 - Acquisition Parameters  
Date\_ 20100827  
Time 20.38  
INSTRUM spect  
PROBHD 5 mm QNP 1H/13  
PULPROG zg30  
TD 65536  
SOLVENT CDCl3  
NS 32  
DS 2  
SWH 8278.146 Hz  
FIDRES 0.126314 Hz  
AQ 3.9584243 sec  
RG 203.2  
OW 60.400 usec  
DE 6.00 usec  
TE 300.2 K  
D1 1.00000000 sec  
MCREST 0.00000000 sec  
MCWRR 0.01500000 sec

\*\*\*\*\* CHANNEL f1 \*\*\*\*\*  
NUC1 1H  
P1 11.50 usec  
PL1 -4.00 dB  
SFO1 400.0324703 MHz

F2 - Processing parameters  
SI 32768  
SF 400.0300062 MHz  
WDW EM  
SSB 0  
LB 0.30 Hz  
GB 0  
PC 1.00

1D NMR plot parameters  
CX 32.00 cm  
CY 18.00 cm  
F1P 8.000 ppm  
F1 3200.24 Hz  
F2P 0.500 ppm  
F2 200.02 Hz  
PPMCM 0.23437 ppm/cm  
HZCM 93.75703 Hz/cm

DPX400 carbon

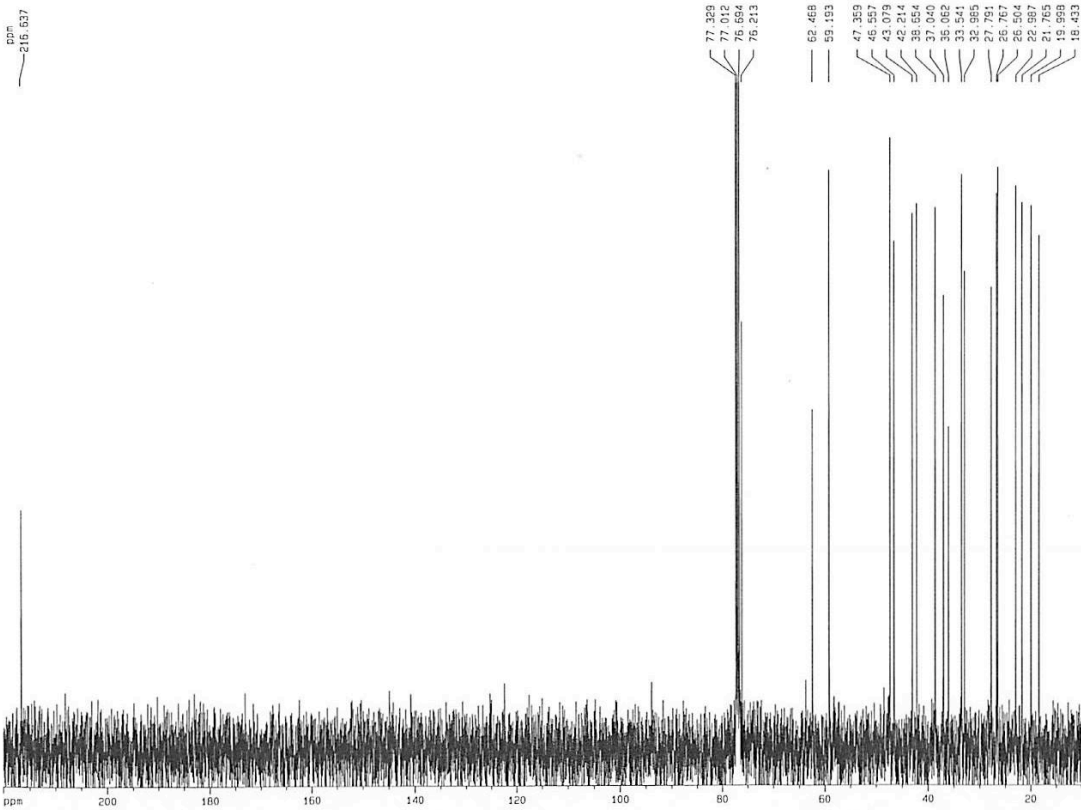

Current Data Parameters  
NAME suzuki  
EXPNO 106  
PROCNO 1

F2 - Acquisition Parameters  
Date\_ 20100827  
Time 20.46  
INSTRUM spect  
PROBHD 5 mm QNP 1H/13  
PULPROG zgpg30  
TD 65536  
SOLVENT CDCl3  
NS 147  
DS 4  
SWH 26178.010 Hz  
FIDRES 0.399445 Hz  
AQ 1.2517875 sec  
RG 3261  
OW 19.100 usec  
DE 6.00 usec  
TE 300.2 K  
D1 2.00000000 sec  
d11 0.03000000 sec  
DELTA 1.89999998 sec  
MCREST 0.00000000 sec  
MCWRR 0.01500000 sec

\*\*\*\*\* CHANNEL f1 \*\*\*\*\*  
NUC1 13C  
P1 10.00 usec  
PL1 -3.50 dB  
SFO1 100.5986686 MHz

\*\*\*\*\* CHANNEL f2 \*\*\*\*\*  
CPDPRG2 waltz16  
NUC2 1H  
PCPD2 100.00 usec  
PL2 -4.00 dB  
PL12 17.00 dB  
PL13 17.00 dB  
SFO2 400.0316001 MHz

F2 - Processing parameters  
SI 32768  
SF 100.5876240 MHz  
WDW EM  
SSB 0  
LB 1.00 Hz  
GB 0  
PC 1.40

1D NMR plot parameters  
CX 30.00 cm  
CY 17.00 cm  
F1P 220.000 ppm  
F1 22129.28 Hz  
F2P 10.000 ppm  
F2 100.58 Hz  
PPMCM 7.00000 ppm/cm  
HZCM 704.11334 Hz/cm

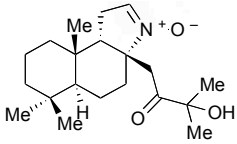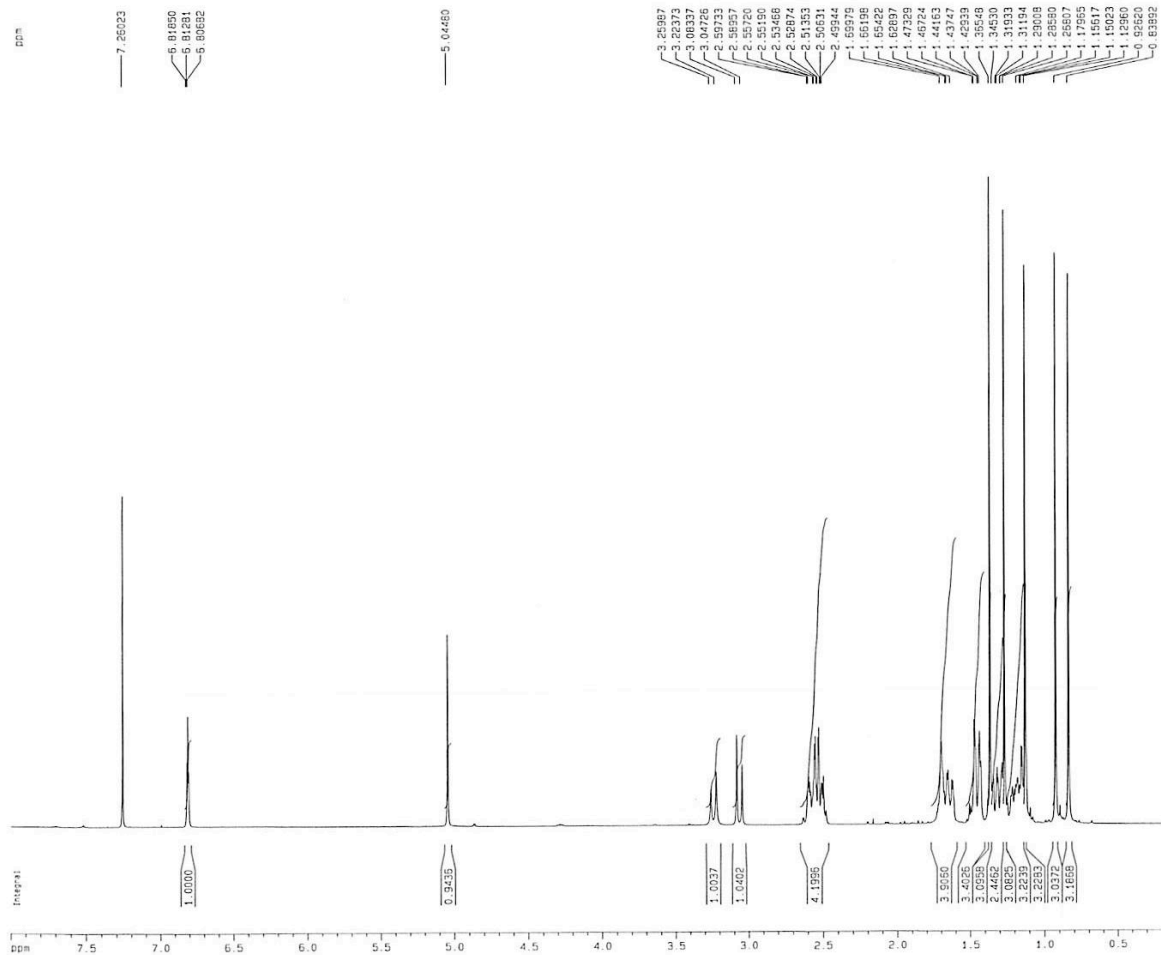

DPX400 carbon

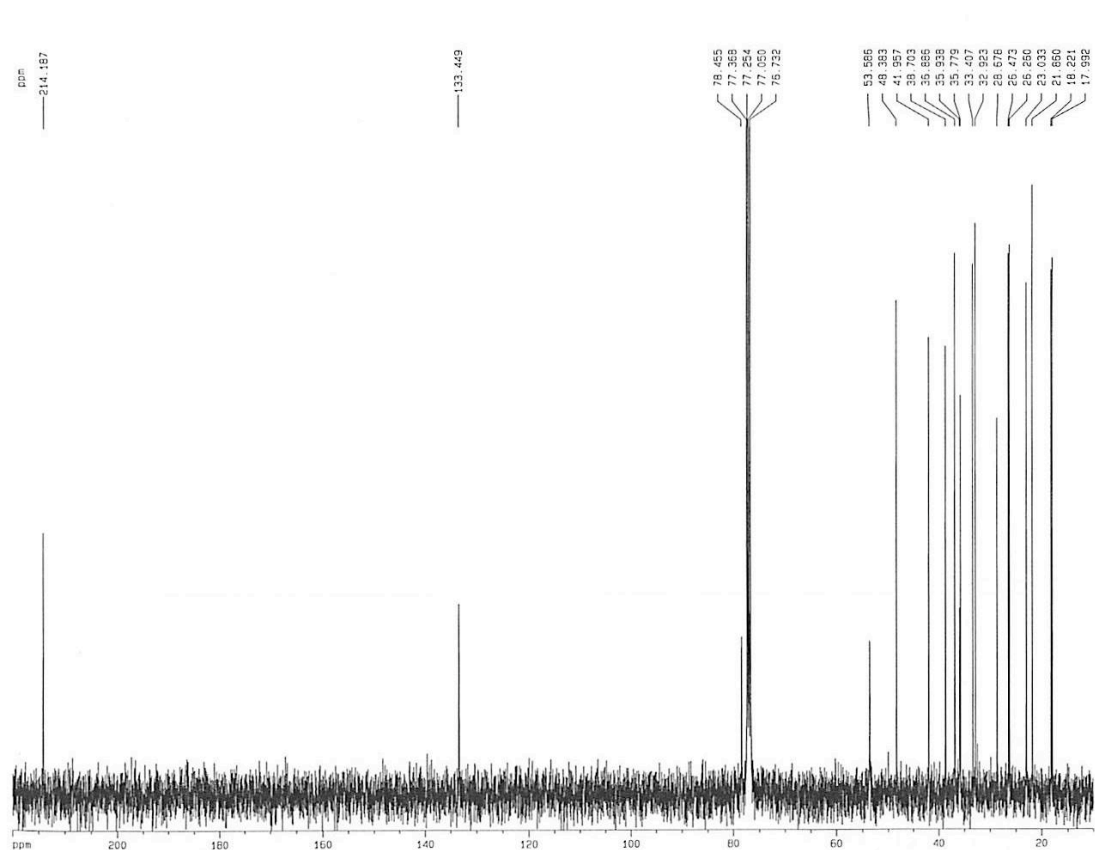

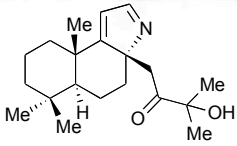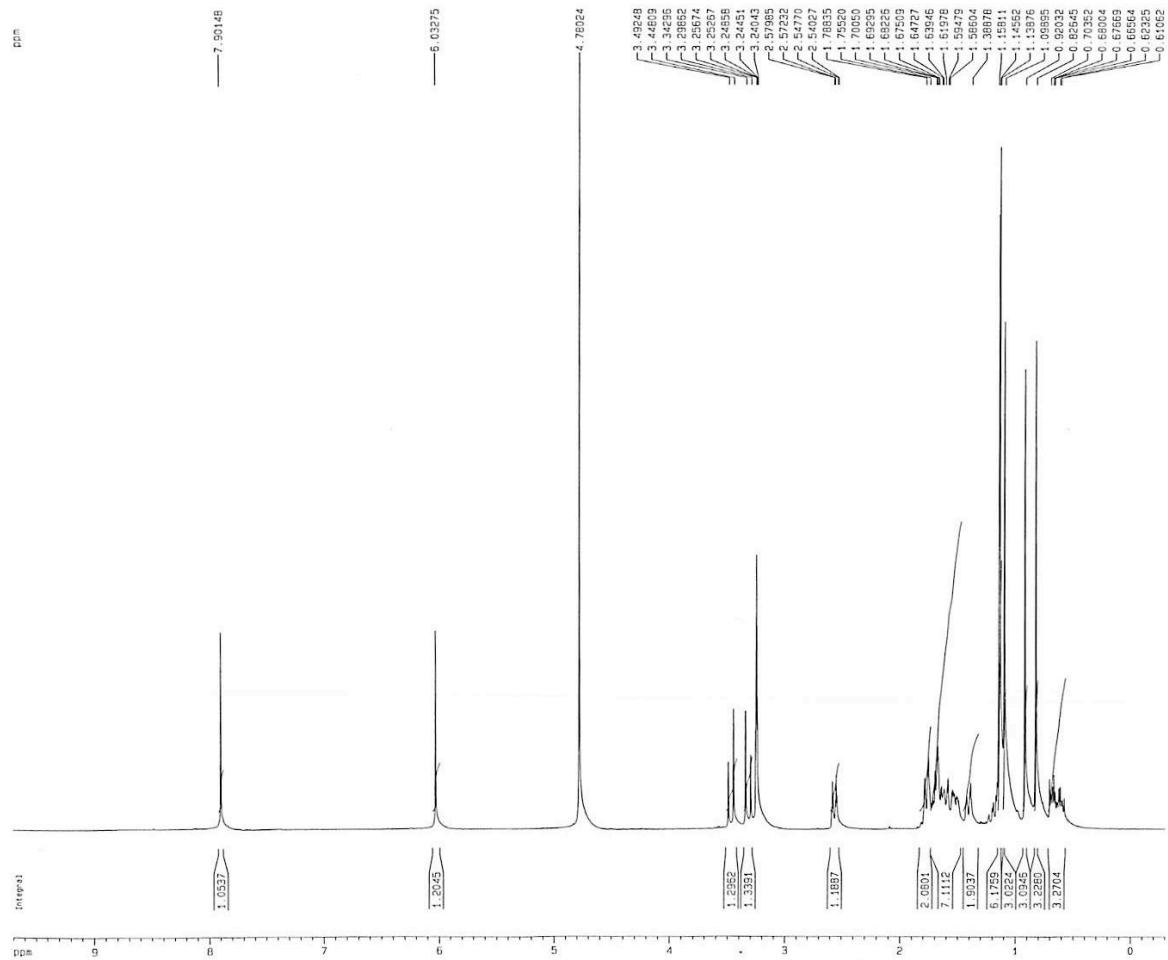

Current Data Parameters  
NAME suzuk1  
EXPNO 115  
PROCNO 1

F2 - Acquisition Parameters  
Date\_ 20100916  
Time 20.15  
INSTRUM spect  
PROBHD 5 mm QNP 1H/13  
PULPROG zg30  
TD 65536  
SOLVENT CDCl3  
NS 16  
DS 2  
SWH 6278.146 Hz  
FIDRES 0.126314 Hz  
AQ 3.9584243 sec  
RG 256  
DM 60.400 usec  
DE 6.00 usec  
TE 300.2 K  
D1 1.00000000 sec  
MCREST 0.00000000 sec  
MCWRR 0.01500000 sec

===== CHANNEL f1 =====  
NUC1 1H  
P1 11.50 usec  
PL1 -4.00 dB  
SFO1 400.0324703 MHz

F2 - Processing parameters  
SI 32768  
SF 400.0300295 MHz  
WDW EM  
SSB 0  
LB 0.30 Hz  
GB 0  
PC 1.00

1D NMR plot parameters  
CX 32.00 cm  
CY 21.00 cm  
F1P 9.700 ppm  
F1 3880.29 Hz  
F2P -0.300 ppm  
F2 -120.01 Hz  
PRCM 0.31250 ppm/cm  
HZCM 125.00938 Hz/cm

DPX400 carbon

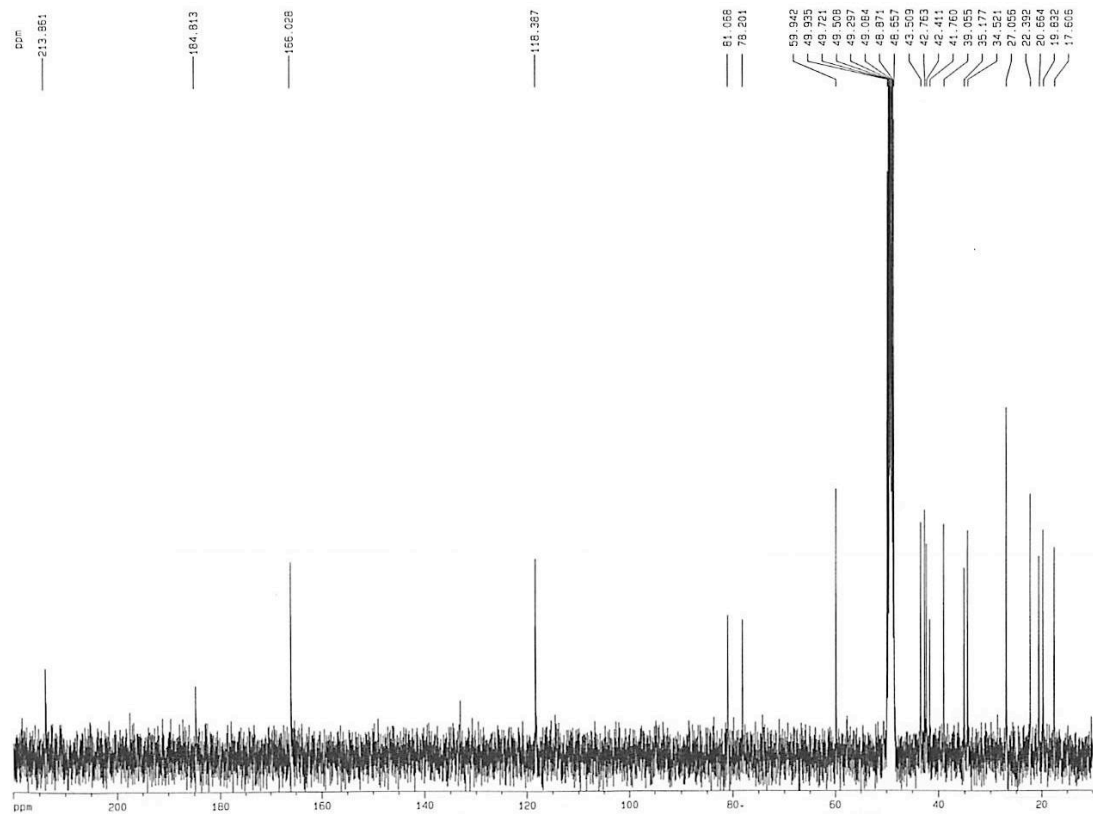

Current Data Parameters  
NAME suzuk1  
EXPNO 116  
PROCNO 1

F2 - Acquisition Parameters  
Date\_ 20100916  
Time 20.18  
INSTRUM spect  
PROBHD 5 mm QNP 1H/13  
PULPROG zgpg30  
TD 65536  
SOLVENT CDCl3  
NS 272  
DS 4  
SWH 26178.010 Hz  
FIDRES 0.399445 Hz  
AQ 1.2517875 sec  
RG 2686.3  
DM 19.100 usec  
DE 6.00 usec  
TE 300.2 K  
D1 2.00000000 sec  
d11 0.03000000 sec  
DELTA 1.89999998 sec  
MCREST 0.00000000 sec  
MCWRR 0.01500000 sec

===== CHANNEL f1 =====  
NUC1 13C  
P1 10.00 usec  
PL1 -3.50 dB  
SFO1 100.5986886 MHz

===== CHANNEL f2 =====  
CPDPRG2 waltz16  
NUC2 1H  
PCPD2 100.00 usec  
PL2 -4.00 dB  
PL12 17.00 dB  
PL13 17.00 dB  
SFO2 400.0316001 MHz

F2 - Processing parameters  
SI 32768  
SF 100.5874520 MHz  
WDW EM  
SSB 0  
LB 1.00 Hz  
GB 0  
PC 1.40

1D NMR plot parameters  
CX 30.00 cm  
CY 100.00 cm  
F1P 220.000 ppm  
F1 22129.24 Hz  
F2P 10.000 ppm  
F2 100.57 Hz  
PRCM 7.00000 ppm/cm  
HZCM 704.11218 Hz/cm
